# Supplementary material for: Prevalence of and risk factors associated with latent tuberculosis infection in a Latin American region
Source: PeerJ journal article supplement (doi:10.7717/peerj.9429), 2020-08-12
Supplement: Supplemental_Data_S2.xlsx [file Supplemental_Data_S2.xlsx]

## Sheet: Raw Database
ID_Individuals	Gender	Age	Age	Social level	TSTmm	TST-10 positivity	TST-15 positvity	BMI	BMI	Overcrowding	Zone	Educational status	Employment situation	Physical activity	Ever smoked	Current smoking	Alcohol consumption	BCG scar
T001	Female	20	20-29	3	6	Negative	Negative	24.2	≥18.5 a 24.9	≤ 3 person/room	North	Post-secondary	Unemployed	No	No	No	No	Yes
T002	Female	51	50-59	2	3	Negative	Negative	23.4	≥18.5 a 24.9	≤ 3 person/room	North	Secondary	Unemployed	No	No	No	No	Yes
T003	Female	59	50-59	1	3	Negative	Negative	19.6	≥18.5 a 24.9	≤ 3 person/room	North	Secondary	Unemployed	No	No	No	No	Yes
T004	Female	58	50-59	3	11	Positive	Negative	20	≥18.5 a 24.9	≤ 3 person/room	North	Primary	Unemployed	No	No	No	No	Yes
T005	Female	42	40-49	2	4	Negative	Negative	31.1	≥30	≤ 3 person/room	North	Primary	Employee	No	Yes	Yes	No	Yes
T006	Female	39	30-39	1	7	Negative	Negative	20.5	≥18.5 a 24.9	≤ 3 person/room	North	Secondary	Unemployed	No	No	No	No	Yes
T007	Female	62	60-69	1	1	Negative	Negative	25.3	≥25 a 30	≤ 3 person/room	North	Primary	Unemployed	No	No	No	No	Yes
T008	Female	34	30-39	3	3	Negative	Negative	26.2	≥25 a 30	≤ 3 person/room	North	Secondary	Unemployed	No	No	No	No	Yes
T009	Female	36	30-39	1	1	Negative	Negative	26.8	≥25 a 30	≤ 3 person/room	North	Secondary	Unemployed	No	No	No	No	Yes
T010	Female	21	20-29	3	1	Negative	Negative	28.9	≥25 a 30	≤ 3 person/room	North	Post-secondary	Employee	No	No	No	No	Yes
T011	Female	49	40-49	1	1	Negative	Negative	25	≥25 a 30	≤ 3 person/room	North	Primary	Unemployed	No	No	No	No	Yes
T012	Male	54	50-59	3	1	Negative	Negative	20.4	≥18.5 a 24.9	≤ 3 person/room	North	Secondary	Employee	No	No	No	No	Yes
T013	Female	21	20-29	1	1	Negative	Negative	28.6	≥25 a 30	≤ 3 person/room	North	Secondary	Unemployed	No	No	No	No	Yes
T014	Male	57	50-59	3	1	Negative	Negative	22.5	≥18.5 a 24.9	≤ 3 person/room	North	Post-secondary	Employee	No	No	No	No	Yes
T015	Female	51	50-59	3	1	Negative	Negative	26.6	≥25 a 30	≤ 3 person/room	North	Secondary	Unemployed	Yes	No	No	No	Yes
T016	Female	48	40-49	3	1	Negative	Negative	28.4	≥25 a 30	≤ 3 person/room	North	Secondary	Unemployed	No	No	No	No	Yes
T017	Female	52	50-59	2	1	Negative	Negative	20.7	≥18.5 a 24.9	≤ 3 person/room	North	Secondary	Unemployed	No	No	No	No	Yes
T018	Female	46	40-49	2	4	Negative	Negative	23.2	≥18.5 a 24.9	≤ 3 person/room	North	Primary	Unemployed	No	No	No	No	Yes
T019	Male	18	14-19	3	1	Negative	Negative	24.4	≥18.5 a 24.9	≤ 3 person/room	North	Post-secondary	Employee	Yes	No	No	No	Yes
T020	Female	46	40-49	1	10	Positive	Negative	23.9	≥18.5 a 24.9	≤ 3 person/room	North	Primary	Employee	No	No	No	No	Yes
T021	Male	25	20-29	1	1	Negative	Negative	22.8	≥18.5 a 24.9	≤ 3 person/room	North	Secondary	Employee	Yes	No	No	No	Yes
T022	Female	51	50-59	2	1	Negative	Negative	22.2	≥18.5 a 24.9	≤ 3 person/room	North	Secondary	Employee	Yes	No	No	No	Yes
T023	Female	30	30-39	1	1	Negative	Negative	26.2	≥25 a 30	≤ 3 person/room	North	Secondary	Unemployed	No	No	No	No	Yes
T024	Female	35	30-39	2	9	Negative	Negative	30.5	≥30	≤ 3 person/room	North	Primary	Employee	No	No	No	No	Yes
T025	Male	48	40-49	2	10	Positive	Negative	24.8	≥18.5 a 24.9	≤ 3 person/room	North	Secondary	Employee	No	No	No	No	Yes
T026	Female	60	60-69	3	5	Negative	Negative	22.3	≥18.5 a 24.9	≤ 3 person/room	North	Primary	Unemployed	Yes	No	No	No	Yes
T027	Male	67	60-69	3	2	Negative	Negative	25.9	≥25 a 30	≤ 3 person/room	North	Primary	Employee	No	No	No	No	Yes
T028	Female	51	50-59	2	1	Negative	Negative	24.9	≥18.5 a 24.9	≤ 3 person/room	North	Primary	Unemployed	No	No	No	No	Yes
T029	Female	29	20-29	3	1	Negative	Negative	19.3	≥18.5 a 24.9	≤ 3 person/room	North	Secondary	Employee	No	Yes	Yes	No	Yes
T030	Female	34	30-39	1	2	Negative	Negative	33.7	≥30	≤ 3 person/room	North	Secondary	Unemployed	No	No	No	No	Yes
T031	Female	57	50-59	1	1	Negative	Negative	31.6	≥30	≤ 3 person/room	North	Primary	Unemployed	No	No	No	No	Yes
T032	Female	39	30-39	2	7	Negative	Negative	28.5	≥25 a 30	≤ 3 person/room	North	Secondary	Unemployed	No	No	No	No	Yes
T033	Female	53	50-59	2	5	Negative	Negative	25.2	≥25 a 30	≤ 3 person/room	North	Primary	Employee	No	No	No	No	Yes
T034	Female	26	20-29	3	16	Positive	Positive	29	≥25 a 30	≤ 3 person/room	North	Primary	Unemployed	No	No	No	No	Yes
T035	Female	21	20-29	2	1	Negative	Negative	9.2	<18.5	> 3 person/room	North	Secondary	Unemployed	No	No	No	No	Yes
T036	Female	33	30-39	3	10	Positive	Negative	37.8	≥30	≤ 3 person/room	North	Secondary	Unemployed	Yes	No	No	No	Yes
T037	Female	60	60-69	3	1	Negative	Negative	24.2	≥18.5 a 24.9	≤ 3 person/room	North	Secondary	Unemployed	No	No	No	No	Yes
T038	Male	56	50-59	2	6	Negative	Negative	29.4	≥25 a 30	≤ 3 person/room	North	Secondary	Employee	Yes	No	No	No	Yes
T039	Female	30	30-39	3	4	Negative	Negative	22.8	≥18.5 a 24.9	> 3 person/room	North	Secondary	Unemployed	No	Yes	Yes	No	Yes
T040	Male	54	50-59	3	4	Negative	Negative	20.8	≥18.5 a 24.9	≤ 3 person/room	North	Secondary	Employee	No	No	No	No	Yes
T041	Female	45	40-49	2	9	Negative	Negative	30.7	≥30	≤ 3 person/room	North	Secondary	Unemployed	No	No	No	No	Yes
T042	Female	52	50-59	1	1	Negative	Negative	28.5	≥25 a 30	≤ 3 person/room	North	Primary	Unemployed	No	No	No	No	Yes
T043	Male	16	14-19	1	1	Negative	Negative	20.3	≥18.5 a 24.9	≤ 3 person/room	North	Secondary	Unemployed	No	No	No	No	Yes
T044	Female	54	50-59	1	10	Positive	Negative	36.1	≥30	≤ 3 person/room	North	Primary	Unemployed	No	No	No	No	Yes
T045	Male	40	40-49	3	3	Negative	Negative	26.1	≥25 a 30	≤ 3 person/room	North	Secondary	Unemployed	Yes	No	No	No	Yes
T046	Female	30	30-39	2	1	Negative	Negative	25	≥25 a 30	≤ 3 person/room	North	Secondary	Unemployed	No	No	No	No	Yes
T047	Female	51	50-59	1	7	Negative	Negative	22.8	≥18.5 a 24.9	≤ 3 person/room	North	Primary	Employee	No	No	No	No	Yes
T048	Female	46	40-49	2	5	Negative	Negative	31.6	≥30	≤ 3 person/room	North	Secondary	Unemployed	No	No	No	No	Yes
T049	Female	21	20-29	3	7	Negative	Negative	20.8	≥18.5 a 24.9	≤ 3 person/room	North	Post-secondary	Unemployed	Yes	Yes	No	High	Yes
T050	Female	54	50-59	3	11	Positive	Negative	25.5	≥25 a 30	≤ 3 person/room	North	Secondary	Employee	Yes	No	No	No	Yes
T051	Female	53	50-59	2	3	Negative	Negative	20	≥18.5 a 24.9	≤ 3 person/room	North	Secondary	Unemployed	No	No	No	No	Yes
T052	Female	22	20-29	1	17	Positive	Positive	34.4	≥30	> 3 person/room	North	Secondary	Employee	No	No	No	No	Yes
T053	Female	48	40-49	1	14	Positive	Negative	27.1	≥25 a 30	≤ 3 person/room	North	Secondary	Unemployed	Yes	No	No	No	Yes
T054	Male	41	40-49	2	11	Positive	Negative	23.6	≥18.5 a 24.9	≤ 3 person/room	North	Secondary	Employee	No	No	No	No	Yes
T055	Female	41	40-49	2	5	Negative	Negative	28.5	≥25 a 30	≤ 3 person/room	North	Secondary	Employee	No	No	No	No	Yes
T056	Female	48	40-49	3	5	Negative	Negative	28.9	≥25 a 30	≤ 3 person/room	North	Post-secondary	Unemployed	No	No	No	No	Yes
T057	Female	39	30-39	1	5	Negative	Negative	22.8	≥18.5 a 24.9	≤ 3 person/room	North	Primary	Employee	No	No	No	No	Yes
T058	Female	31	30-39	3	1	Negative	Negative	20.3	≥18.5 a 24.9	≤ 3 person/room	North	Primary	Unemployed	No	No	No	No	Yes
T059	Female	34	30-39	3	5	Negative	Negative	26.2	≥25 a 30	≤ 3 person/room	North	Secondary	Unemployed	No	No	No	No	Yes
T060	Male	55	50-59	3	14	Positive	Negative	26.4	≥25 a 30	> 3 person/room	North	Primary	Employee	No	Yes	Yes	No	Yes
T061	Female	34	30-39	1	2	Negative	Negative	27.4	≥25 a 30	> 3 person/room	North	Secondary	Unemployed	No	No	No	No	Yes
T062	Male	57	50-59	1	7	Negative	Negative	22.7	≥18.5 a 24.9	≤ 3 person/room	North	Primary	Employee	No	No	No	No	Yes
T063	Female	27	20-29	3	4	Negative	Negative	20.9	≥18.5 a 24.9	≤ 3 person/room	North	Secondary	Employee	No	No	No	No	Yes
T064	Female	27	20-29	1	14	Positive	Negative	25.5	≥25 a 30	≤ 3 person/room	North	Secondary	Employee	Yes	No	No	No	Yes
T065	Female	35	30-39	1	10	Positive	Negative	24.2	≥18.5 a 24.9	≤ 3 person/room	North	Secondary	Employee	Yes	No	No	No	Yes
T066	Female	60	60-69	1	4	Negative	Negative	27.4	≥25 a 30	≤ 3 person/room	North	Primary	Unemployed	No	No	No	No	Yes
T067	Female	33	30-39	1	4	Negative	Negative	28.4	≥25 a 30	≤ 3 person/room	North	Secondary	Unemployed	No	No	No	No	Yes
T068	Female	58	50-59	2	3	Negative	Negative	40	≥30	≤ 3 person/room	North	Secondary	Employee	No	No	No	No	Yes
T069	Female	24	20-29	3	1	Negative	Negative	33.3	≥30	≤ 3 person/room	North	Secondary	Unemployed	No	No	No	No	Yes
T070	Female	46	40-49	3	4	Negative	Negative	26.8	≥25 a 30	≤ 3 person/room	North	Primary	Unemployed	No	No	No	No	Yes
T071	Female	49	40-49	1	14	Positive	Negative	20.2	≥18.5 a 24.9	≤ 3 person/room	North	Primary	Unemployed	No	No	No	No	Yes
T072	Male	17	14-19	2	6	Negative	Negative	18.3	<18.5	≤ 3 person/room	North	Secondary	Unemployed	No	No	No	No	Yes
T073	Female	49	40-49	2	1	Negative	Negative	29.8	≥25 a 30	≤ 3 person/room	North	Secondary	Employee	No	No	No	No	Yes
T074	Male	23	20-29	2	1	Negative	Negative	16.2	<18.5	≤ 3 person/room	North	Secondary	Unemployed	No	No	No	No	Yes
T075	Female	41	40-49	3	15	Positive	Positive	28.9	≥25 a 30	> 3 person/room	North	Secondary	Employee	No	No	No	No	Yes
T076	Female	40	40-49	3	2	Negative	Negative	32	≥30	> 3 person/room	North	Secondary	Employee	No	No	No	No	Yes
T077	Female	35	30-39	2	3	Negative	Negative	28.3	≥25 a 30	≤ 3 person/room	North	Primary	Employee	No	No	No	No	Yes
T078	Female	57	50-59	2	1	Negative	Negative	20.4	≥18.5 a 24.9	≤ 3 person/room	North	Primary	Employee	Yes	Yes	Yes	No	Yes
T079	Female	52	50-59	1	2	Negative	Negative	24	≥18.5 a 24.9	≤ 3 person/room	North	Secondary	Employee	No	No	No	No	Yes
T080	Female	48	40-49	1	7	Negative	Negative	33.7	≥30	≤ 3 person/room	North	Primary	Unemployed	No	No	No	No	Yes
T081	Female	42	40-49	2	13	Positive	Negative	27	≥25 a 30	≤ 3 person/room	North	Primary	Employee	No	No	No	No	Yes
T082	Male	48	40-49	1	4	Negative	Negative	23.3	≥18.5 a 24.9	≤ 3 person/room	North	Secondary	Employee	No	No	No	No	Yes
T083	Male	48	40-49	2	14	Positive	Negative	23.5	≥18.5 a 24.9	≤ 3 person/room	North	Secondary	Employee	Yes	Yes	Yes	No	Yes
T084	Female	21	20-29	3	2	Negative	Negative	21.1	≥18.5 a 24.9	≤ 3 person/room	North	Secondary	Unemployed	No	No	No	No	Yes
T085	Male	31	30-39	2	15	Positive	Positive	19.2	≥18.5 a 24.9	≤ 3 person/room	North	Secondary	Unemployed	Yes	Yes	Yes	No	Yes
T086	Male	45	40-49	1	15	Positive	Positive	31.7	≥30	≤ 3 person/room	North	Secondary	Employee	Yes	No	No	No	Yes
T087	Female	24	20-29	2	3	Negative	Negative	19.5	≥18.5 a 24.9	≤ 3 person/room	North	Secondary	Employee	No	No	No	No	Yes
T088	Female	51	50-59	3	4	Negative	Negative	24.2	≥18.5 a 24.9	≤ 3 person/room	North	Secondary	Unemployed	No	No	No	No	Yes
T089	Female	41	40-49	1	3	Negative	Negative	26.7	≥25 a 30	≤ 3 person/room	North	Secondary	Unemployed	No	No	No	No	Yes
T090	Female	44	40-49	1	7	Negative	Negative	25	≥25 a 30	≤ 3 person/room	North	Secondary	Unemployed	No	No	No	No	Yes
T091	Male	17	14-19	1	5	Negative	Negative	18.6	≥18.5 a 24.9	≤ 3 person/room	North	Secondary	Unemployed	No	No	No	No	Yes
T092	Female	56	50-59	3	3	Negative	Negative	25.7	≥25 a 30	≤ 3 person/room	North	Secondary	Employee	Yes	No	No	No	Yes
T093	Male	59	50-59	3	1	Negative	Negative	28.4	≥25 a 30	≤ 3 person/room	North	Secondary	Employee	Yes	No	No	No	Yes
T094	Female	61	60-69	1	2	Negative	Negative	24.9	≥18.5 a 24.9	≤ 3 person/room	North	Primary	Unemployed	No	No	No	No	Yes
T095	Male	37	30-39	3	11	Positive	Negative	28	≥25 a 30	≤ 3 person/room	North	Secondary	Employee	No	No	No	No	Yes
T096	Female	60	60-69	2	9	Negative	Negative	33.3	≥30	≤ 3 person/room	North	Primary	Unemployed	No	No	No	Moderate	Yes
T097	Female	36	30-39	2	5	Negative	Negative	29.1	≥25 a 30	≤ 3 person/room	North	Secondary	Unemployed	No	No	No	No	Yes
T098	Female	32	30-39	2	3	Negative	Negative	28.3	≥25 a 30	≤ 3 person/room	North	Secondary	Employee	No	Yes	Yes	No	Yes
T099	Female	26	20-29	2	1	Negative	Negative	23.4	≥18.5 a 24.9	≤ 3 person/room	North	Primary	Unemployed	No	No	No	No	Yes
T100	Male	42	40-49	3	3	Negative	Negative	27.9	≥25 a 30	≤ 3 person/room	North	Primary	Employee	No	No	No	No	Yes
T101	Male	15	14-19	3	2	Negative	Negative	16	<18.5	≤ 3 person/room	North	Post-secondary	Unemployed	No	No	No	No	Yes
T102	Female	49	40-49	3	12	Positive	Negative	32.5	≥30	≤ 3 person/room	North	Secondary	Unemployed	No	No	No	No	Yes
T103	Female	42	40-49	3	5	Negative	Negative	23.1	≥18.5 a 24.9	> 3 person/room	North	Secondary	Unemployed	No	No	No	No	Yes
T104	Female	42	40-49	3	15	Positive	Positive	24.2	≥18.5 a 24.9	≤ 3 person/room	North	Primary	Unemployed	No	Yes	Yes	No	Yes
T105	Female	34	30-39	3	10	Positive	Negative	27.1	≥25 a 30	≤ 3 person/room	North	Secondary	Employee	No	No	No	No	Yes
T106	Female	54	50-59	2	2	Negative	Negative	21.8	≥18.5 a 24.9	≤ 3 person/room	North	Primary	Employee	No	No	No	No	Yes
T107	Female	56	50-59	1	1	Negative	Negative	29.4	≥25 a 30	≤ 3 person/room	North	Primary	Unemployed	No	No	No	No	Yes
T108	Male	23	20-29	3	1	Negative	Negative	19.2	≥18.5 a 24.9	≤ 3 person/room	North	Post-secondary	Employee	No	No	No	No	Yes
T109	Female	25	20-29	1	4	Negative	Negative	20.3	≥18.5 a 24.9	≤ 3 person/room	North	Secondary	Unemployed	No	No	No	No	Yes
T110	Female	47	40-49	3	14	Positive	Negative	24.3	≥18.5 a 24.9	≤ 3 person/room	North	Primary	Employee	Yes	No	No	No	Yes
T111	Female	28	20-29	1	3	Negative	Negative	26.8	≥25 a 30	> 3 person/room	North	Secondary	Unemployed	No	No	No	No	Yes
T112	Female	46	40-49	1	1	Negative	Negative	19.8	≥18.5 a 24.9	≤ 3 person/room	North	Secondary	Employee	Yes	No	No	No	Yes
T113	Female	45	40-49	2	1	Negative	Negative	25.9	≥25 a 30	≤ 3 person/room	North	Secondary	Employee	Yes	No	No	No	Yes
T114	Male	17	14-19	2	1	Negative	Negative	19.9	≥18.5 a 24.9	≤ 3 person/room	North	Secondary	Employee	No	No	No	No	Yes
T115	Female	58	50-59	1	5	Negative	Negative	29.3	≥25 a 30	≤ 3 person/room	North	Primary	Unemployed	Yes	Yes	Yes	No	Yes
T116	Male	55	50-59	3	10	Positive	Negative	29.5	≥25 a 30	≤ 3 person/room	North	Secondary	Employee	No	No	No	No	Yes
T117	Male	38	30-39	3	3	Negative	Negative	27.7	≥25 a 30	≤ 3 person/room	North	Post-secondary	Employee	Yes	No	No	No	Yes
T118	Female	56	50-59	1	1	Negative	Negative	23.2	≥18.5 a 24.9	≤ 3 person/room	North	Secondary	Unemployed	No	No	No	No	Yes
T119	Female	52	50-59	3	6	Negative	Negative	28.7	≥25 a 30	≤ 3 person/room	North	Secondary	Unemployed	No	Yes	Yes	No	Yes
T120	Female	61	60-69	3	2	Negative	Negative	32.5	≥30	≤ 3 person/room	North	Primary	Unemployed	No	No	No	No	Yes
T121	Male	54	50-59	3	2	Negative	Negative	30.4	≥30	≤ 3 person/room	North	Primary	Unemployed	No	No	No	No	Yes
T122	Female	49	40-49	2	4	Negative	Negative	26.2	≥25 a 30	≤ 3 person/room	North	Secondary	Unemployed	No	No	No	No	Yes
T123	Female	50	50-59	1	9	Negative	Negative	25.3	≥25 a 30	≤ 3 person/room	North	Primary	Unemployed	No	No	No	No	Yes
T124	Female	41	40-49	2	20	Positive	Positive	20.6	≥18.5 a 24.9	≤ 3 person/room	North	Secondary	Unemployed	No	No	No	No	Yes
T125	Female	19	14-19	2	6	Negative	Negative	21	≥18.5 a 24.9	≤ 3 person/room	North	Secondary	Unemployed	No	No	No	No	Yes
T126	Female	51	50-59	3	1	Negative	Negative	30.5	≥30	≤ 3 person/room	North	Primary	Unemployed	No	No	No	No	Yes
T127	Male	54	50-59	3	8	Negative	Negative	25.7	≥25 a 30	≤ 3 person/room	North	Secondary	Employee	No	No	No	No	Yes
T128	Female	53	50-59	1	5	Negative	Negative	29.5	≥25 a 30	≤ 3 person/room	North	Secondary	Employee	No	No	No	No	Yes
T129	Female	35	30-39	2	1	Negative	Negative	28.7	≥25 a 30	≤ 3 person/room	North	Secondary	Employee	No	Yes	Yes	Moderate	Yes
T130	Female	27	20-29	2	1	Negative	Negative	16.6	<18.5	≤ 3 person/room	North	Secondary	Unemployed	Yes	No	No	No	Yes
T131	Female	17	14-19	2	1	Negative	Negative	19.1	≥18.5 a 24.9	≤ 3 person/room	North	Secondary	Unemployed	No	No	No	No	Yes
T132	Female	29	20-29	3	12	Positive	Negative	24.2	≥18.5 a 24.9	≤ 3 person/room	North	Secondary	Employee	No	No	No	No	Yes
T133	Female	22	20-29	1	3	Negative	Negative	29.2	≥25 a 30	≤ 3 person/room	North	Secondary	Unemployed	No	No	No	No	Yes
T134	Female	42	40-49	2	13	Positive	Negative	32.4	≥30	≤ 3 person/room	North	Primary	Unemployed	Yes	No	No	No	Yes
T135	Female	22	20-29	3	1	Negative	Negative	25.4	≥25 a 30	≤ 3 person/room	North	Secondary	Unemployed	No	No	No	No	Yes
T136	Female	50	50-59	2	4	Negative	Negative	32.4	≥30	≤ 3 person/room	North	Primary	Unemployed	No	No	No	No	Yes
T137	Female	33	30-39	1	3	Negative	Negative	27.1	≥25 a 30	≤ 3 person/room	North	Secondary	Employee	Yes	No	No	No	Yes
T138	Female	36	30-39	3	1	Negative	Negative	16.4	<18.5	≤ 3 person/room	North	Secondary	Unemployed	No	No	No	No	Yes
T139	Female	53	50-59	3	4	Negative	Negative	25.6	≥25 a 30	≤ 3 person/room	North	Primary	Unemployed	No	No	No	No	Yes
T140	Female	31	30-39	3	5	Negative	Negative	32.5	≥30	≤ 3 person/room	North	Secondary	Unemployed	No	No	No	No	Yes
T141	Female	46	40-49	3	1	Negative	Negative	21.1	≥18.5 a 24.9	≤ 3 person/room	North	Secondary	Unemployed	Yes	No	No	No	Yes
T142	Female	23	20-29	3	7	Negative	Negative	25	≥25 a 30	≤ 3 person/room	North	Secondary	Unemployed	No	No	No	No	Yes
T143	Female	19	14-19	1	4	Negative	Negative	22.5	≥18.5 a 24.9	≤ 3 person/room	North	Secondary	Unemployed	Yes	No	No	No	Yes
T144	Female	40	40-49	1	6	Negative	Negative	31.2	≥30	≤ 3 person/room	North	Primary	Unemployed	No	Yes	Yes	No	Yes
T145	Female	21	20-29	2	3	Negative	Negative	29.4	≥25 a 30	≤ 3 person/room	North	Secondary	Employee	No	No	No	No	Yes
T146	Female	45	40-49	3	1	Negative	Negative	26.8	≥25 a 30	≤ 3 person/room	North	Secondary	Employee	No	No	No	No	Yes
T147	Female	22	20-29	3	8	Negative	Negative	33.5	≥30	≤ 3 person/room	North	Secondary	Unemployed	Yes	No	No	No	Yes
T148	Female	26	20-29	3	1	Negative	Negative	18.7	≥18.5 a 24.9	≤ 3 person/room	North	Secondary	Unemployed	No	No	No	No	Yes
T149	Female	55	50-59	3	4	Negative	Negative	24.5	≥18.5 a 24.9	≤ 3 person/room	North	Primary	Unemployed	Yes	No	No	No	Yes
T150	Female	22	20-29	3	1	Negative	Negative	35.2	≥30	≤ 3 person/room	North	Secondary	Unemployed	No	No	No	No	Yes
T151	Female	25	20-29	3	1	Negative	Negative	37.9	≥30	> 3 person/room	North	Secondary	Unemployed	Yes	No	No	No	Yes
T152	Female	42	40-49	3	1	Negative	Negative	24.9	≥18.5 a 24.9	≤ 3 person/room	North	Secondary	Employee	No	No	No	No	Yes
T153	Female	35	30-39	3	7	Negative	Negative	27.8	≥25 a 30	≤ 3 person/room	North	Primary	Unemployed	No	No	No	No	Yes
T154	Female	19	14-19	3	5	Negative	Negative	20.8	≥18.5 a 24.9	≤ 3 person/room	North	Secondary	Unemployed	No	No	No	No	Yes
T155	Female	50	50-59	2	4	Negative	Negative	24.9	≥18.5 a 24.9	≤ 3 person/room	North	Secondary	Unemployed	No	Yes	Yes	No	Yes
T156	Female	26	20-29	3	10	Positive	Negative	27.2	≥25 a 30	≤ 3 person/room	North	Secondary	Unemployed	No	No	No	Low	Yes
T157	Female	41	40-49	2	11	Positive	Negative	22.9	≥18.5 a 24.9	≤ 3 person/room	North	Secondary	Unemployed	No	No	No	Low	Yes
T158	Male	61	60-69	1	10	Positive	Negative	22.1	≥18.5 a 24.9	≤ 3 person/room	North	Secondary	Employee	No	Yes	No	No	Yes
T159	Female	21	20-29	3	5	Negative	Negative	27.1	≥25 a 30	≤ 3 person/room	North	Secondary	Unemployed	Yes	No	No	No	Yes
T160	Male	30	30-39	2	3	Negative	Negative	19.5	≥18.5 a 24.9	≤ 3 person/room	North	Secondary	Employee	Yes	Yes	Yes	No	Yes
T161	Female	48	40-49	3	11	Positive	Negative	25.6	≥25 a 30	≤ 3 person/room	North	Primary	Employee	No	No	No	No	Yes
T162	Male	55	50-59	3	5	Negative	Negative	23.4	≥18.5 a 24.9	≤ 3 person/room	North	Primary	Employee	No	No	No	No	Yes
T163	Female	47	40-49	1	5	Negative	Negative	23.4	≥18.5 a 24.9	> 3 person/room	North	Secondary	Unemployed	Yes	No	No	No	Yes
T164	Female	50	50-59	2	15	Positive	Positive	28.3	≥25 a 30	> 3 person/room	North	Primary	Employee	No	Yes	No	No	Yes
T165	Female	38	30-39	3	4	Negative	Negative	29	≥25 a 30	≤ 3 person/room	North	Secondary	Unemployed	No	No	No	No	Yes
T166	Female	48	40-49	2	2	Negative	Negative	21.5	≥18.5 a 24.9	≤ 3 person/room	North	Primary	Employee	No	No	No	No	Yes
T167	Female	28	20-29	2	1	Negative	Negative	25.9	≥25 a 30	≤ 3 person/room	North	Secondary	Employee	No	No	No	No	Yes
T168	Female	54	50-59	2	1	Negative	Negative	22.5	≥18.5 a 24.9	≤ 3 person/room	North	Secondary	Unemployed	Yes	No	No	No	Yes
T169	Female	63	60-69	3	2	Negative	Negative	23.9	≥18.5 a 24.9	≤ 3 person/room	North	Secondary	Unemployed	No	No	No	No	Yes
T170	Female	62	60-69	3	3	Negative	Negative	18.5	<18.5	≤ 3 person/room	North	Secondary	Unemployed	No	No	No	No	Yes
T171	Female	17	14-19	2	1	Negative	Negative	19	≥18.5 a 24.9	≤ 3 person/room	North	Secondary	Unemployed	No	No	No	No	Yes
T172	Female	55	50-59	2	1	Negative	Negative	29.9	≥25 a 30	≤ 3 person/room	North	Primary	Unemployed	Yes	No	No	No	Yes
T173	Female	43	40-49	2	1	Negative	Negative	17.7	<18.5	≤ 3 person/room	North	Secondary	Unemployed	No	Yes	Yes	No	Yes
T174	Female	17	14-19	2	2	Negative	Negative	18.6	≥18.5 a 24.9	> 3 person/room	North	Secondary	Unemployed	No	No	No	Low	Yes
T175	Female	53	50-59	2	3	Negative	Negative	32.9	≥30	≤ 3 person/room	North	Post-secondary	Employee	Yes	No	No	Low	Yes
T176	Female	63	60-69	2	5	Negative	Negative	29.2	≥25 a 30	≤ 3 person/room	North	Post-secondary	Employee	No	No	No	No	Yes
T177	Female	62	60-69	2	1	Negative	Negative	26.5	≥25 a 30	≤ 3 person/room	North	Primary	Unemployed	No	Yes	Yes	No	Yes
T178	Female	44	40-49	2	1	Negative	Negative	24.6	≥18.5 a 24.9	≤ 3 person/room	North	Secondary	Unemployed	Yes	No	No	No	Yes
T179	Female	55	50-59	2	1	Negative	Negative	36.1	≥30	≤ 3 person/room	North	Primary	Unemployed	No	Yes	Yes	Low	Yes
T180	Female	41	40-49	1	2	Negative	Negative	29.5	≥25 a 30	≤ 3 person/room	North	Secondary	Unemployed	No	No	No	No	Yes
T181	Female	17	14-19	1	3	Negative	Negative	24.9	≥18.5 a 24.9	≤ 3 person/room	North	Secondary	Unemployed	No	No	No	No	Yes
T182	Female	40	40-49	2	1	Negative	Negative	29.5	≥25 a 30	≤ 3 person/room	North	Secondary	Unemployed	No	No	No	Moderate	Yes
T183	Female	45	40-49	3	4	Negative	Negative	38.1	≥30	≤ 3 person/room	North	Secondary	Unemployed	No	No	No	Low	No
T184	Male	39	30-39	2	1	Negative	Negative	37	≥30	≤ 3 person/room	North	Secondary	Unemployed	No	No	No	No	Yes
T185	Female	49	40-49	2	1	Negative	Negative	24.8	≥18.5 a 24.9	≤ 3 person/room	North	Secondary	Unemployed	No	No	No	No	Yes
T186	Female	39	30-39	2	1	Negative	Negative	23.7	≥18.5 a 24.9	≤ 3 person/room	North	Secondary	Unemployed	No	No	No	No	Yes
T187	Male	53	50-59	2	19	Positive	Positive	20.9	≥18.5 a 24.9	≤ 3 person/room	North	Secondary	Employee	Yes	Yes	Yes	No	Yes
T188	Female	42	40-49	3	1	Negative	Negative	30.5	≥30	≤ 3 person/room	North	Secondary	Employee	Yes	No	No	No	Yes
T189	Female	60	60-69	2	25	Positive	Positive	29.7	≥25 a 30	≤ 3 person/room	North	Primary	Employee	Yes	No	No	Low	Yes
T190	Male	22	20-29	2	9	Negative	Negative	30.4	≥30	≤ 3 person/room	North	Post-secondary	Employee	Yes	Yes	Yes	Low	Yes
T191	Female	45	40-49	2	11	Positive	Negative	25.9	≥25 a 30	≤ 3 person/room	North	Secondary	Unemployed	Yes	No	No	No	Yes
T192	Female	47	40-49	3	9	Negative	Negative	25.5	≥25 a 30	≤ 3 person/room	North	Secondary	Employee	Yes	No	No	No	Yes
T193	Male	30	30-39	1	1	Negative	Negative	27.3	≥25 a 30	≤ 3 person/room	North	Secondary	Employee	No	Yes	Yes	Moderate	Yes
T194	Male	31	30-39	1	4	Negative	Negative	26.4	≥25 a 30	≤ 3 person/room	North	Secondary	Employee	No	No	No	No	Yes
T195	Female	30	30-39	2	1	Negative	Negative	30	≥30	≤ 3 person/room	North	Secondary	Unemployed	Yes	No	No	No	Yes
T196	Female	26	20-29	2	1	Negative	Negative	26.9	≥25 a 30	≤ 3 person/room	North	Post-secondary	Unemployed	No	No	No	Low	No
T197	Female	63	60-69	2	1	Negative	Negative	33.6	≥30	≤ 3 person/room	North	Secondary	Unemployed	No	No	No	No	No
T198	Female	56	50-59	2	1	Negative	Negative	23.1	≥18.5 a 24.9	≤ 3 person/room	North	Primary	Unemployed	No	No	No	No	Yes
T199	Female	54	50-59	2	1	Negative	Negative	20	≥18.5 a 24.9	≤ 3 person/room	North	Secondary	Unemployed	Yes	No	No	No	Yes
T200	Female	25	20-29	2	1	Negative	Negative	24.1	≥18.5 a 24.9	≤ 3 person/room	North	Secondary	Unemployed	Yes	No	No	No	No
T201	Female	58	50-59	2	25	Positive	Positive	24.2	≥18.5 a 24.9	≤ 3 person/room	North	Primary	Employee	Yes	No	No	No	Yes
T202	Female	26	20-29	1	1	Negative	Negative	32.9	≥30	≤ 3 person/room	North	Secondary	Unemployed	No	No	No	Moderate	Yes
T203	Male	17	14-19	1	1	Negative	Negative	19.8	≥18.5 a 24.9	≤ 3 person/room	North	Secondary	Unemployed	Yes	No	No	No	No
T204	Female	54	50-59	1	2	Negative	Negative	27.3	≥25 a 30	≤ 3 person/room	North	Primary	Employee	No	No	No	No	Yes
T205	Female	39	30-39	2	1	Negative	Negative	24.3	≥18.5 a 24.9	≤ 3 person/room	North	Secondary	Unemployed	No	No	No	No	Yes
T206	Female	47	40-49	1	1	Negative	Negative	24.9	≥18.5 a 24.9	≤ 3 person/room	North	Primary	Unemployed	No	No	No	Low	Yes
T207	Male	53	50-59	1	1	Negative	Negative	27.8	≥25 a 30	≤ 3 person/room	North	Secondary	Employee	No	No	No	No	Yes
T208	Female	56	50-59	2	1	Negative	Negative	25.5	≥25 a 30	≤ 3 person/room	North	Primary	Employee	No	No	No	No	Yes
T209	Female	45	40-49	1	1	Negative	Negative	25.5	≥25 a 30	≤ 3 person/room	North	Primary	Employee	No	No	No	No	Yes
T210	Female	49	40-49	2	1	Negative	Negative	27.9	≥25 a 30	≤ 3 person/room	North	Secondary	Unemployed	Yes	No	No	No	Yes
T211	Female	50	50-59	2	1	Negative	Negative	22.2	≥18.5 a 24.9	≤ 3 person/room	North	Primary	Employee	No	No	No	No	No
T212	Female	32	30-39	2	1	Negative	Negative	21.5	≥18.5 a 24.9	≤ 3 person/room	North	Secondary	Employee	Yes	No	No	Low	Yes
T213	Female	44	40-49	2	1	Negative	Negative	32.1	≥30	≤ 3 person/room	North	Primary	Unemployed	No	Yes	Yes	No	Yes
T214	Female	38	30-39	2	1	Negative	Negative	27.3	≥25 a 30	≤ 3 person/room	North	Secondary	Unemployed	Yes	Yes	Yes	No	Yes
T215	Female	30	30-39	2	1	Negative	Negative	27	≥25 a 30	≤ 3 person/room	North	Secondary	Employee	No	No	No	No	Yes
T216	Female	39	30-39	3	1	Negative	Negative	54.1	≥30	≤ 3 person/room	North	Secondary	Employee	No	No	No	No	Yes
T217	Male	15	14-19	3	1	Negative	Negative	24	≥18.5 a 24.9	≤ 3 person/room	North	Secondary	Employee	No	No	No	No	No
T218	Male	28	20-29	2	1	Negative	Negative	22.5	≥18.5 a 24.9	≤ 3 person/room	North	Secondary	Unemployed	Yes	No	No	Low	Yes
T219	Female	36	30-39	2	1	Negative	Negative	38.8	≥30	≤ 3 person/room	North	Secondary	Employee	Yes	No	No	No	Yes
T220	Female	40	40-49	2	1	Negative	Negative	28.2	≥25 a 30	≤ 3 person/room	North	Primary	Unemployed	No	No	No	Moderate	Yes
T221	Female	44	40-49	2	1	Negative	Negative	26.2	≥25 a 30	≤ 3 person/room	North	Primary	Unemployed	No	No	No	No	Yes
T222	Female	50	50-59	2	2	Negative	Negative	17.6	<18.5	≤ 3 person/room	North	Secondary	Unemployed	Yes	No	No	No	Yes
T223	Male	52	50-59	3	1	Negative	Negative	20.1	≥18.5 a 24.9	≤ 3 person/room	North	Secondary	Unemployed	No	No	No	No	Yes
T224	Female	47	40-49	3	12	Positive	Negative	42.1	≥30	≤ 3 person/room	North	Secondary	Unemployed	No	No	No	No	Yes
T225	Male	61	60-69	2	1	Negative	Negative	26.3	≥25 a 30	≤ 3 person/room	North	Secondary	Unemployed	No	No	No	No	No
T226	Female	14	14-19	3	7	Negative	Negative	22	≥18.5 a 24.9	≤ 3 person/room	North	Secondary	Unemployed	No	No	No	No	Yes
T227	Female	28	20-29	3	1	Negative	Negative	27.9	≥25 a 30	≤ 3 person/room	North	Secondary	Employee	Yes	No	No	Low	Yes
T228	Male	65	60-69	1	1	Negative	Negative	35.6	≥30	≤ 3 person/room	North	Secondary	Employee	Yes	No	No	No	No
T229	Female	43	40-49	1	1	Negative	Negative	26.8	≥25 a 30	≤ 3 person/room	North	Secondary	Unemployed	No	Yes	Yes	Moderate	Yes
T230	Female	40	40-49	1	5	Negative	Negative	24	≥18.5 a 24.9	≤ 3 person/room	North	Secondary	Unemployed	Yes	No	No	No	Yes
T231	Female	60	60-69	3	1	Negative	Negative	21.6	≥18.5 a 24.9	≤ 3 person/room	North	Secondary	Unemployed	No	No	No	No	Yes
T232	Female	50	50-59	3	2	Negative	Negative	29.8	≥25 a 30	≤ 3 person/room	North	Primary	Unemployed	No	No	No	No	Yes
T233	Female	61	60-69	3	9	Negative	Negative	17.4	<18.5	≤ 3 person/room	North	Primary	Employee	No	No	No	No	Yes
T234	Male	32	30-39	2	1	Negative	Negative	22.8	≥18.5 a 24.9	≤ 3 person/room	North	Secondary	Employee	No	Yes	Yes	No	No
T235	Male	35	30-39	2	1	Negative	Negative	27.1	≥25 a 30	≤ 3 person/room	North	Post-secondary	Employee	Yes	Yes	Yes	High	Yes
T236	Female	20	20-29	1	1	Negative	Negative	20.1	≥18.5 a 24.9	≤ 3 person/room	North	Post-secondary	Employee	Yes	No	No	No	Yes
T237	Female	53	50-59	2	1	Negative	Negative	23.6	≥18.5 a 24.9	≤ 3 person/room	North	Secondary	Unemployed	Yes	No	No	No	Yes
T238	Female	36	30-39	2	1	Negative	Negative	26.3	≥25 a 30	≤ 3 person/room	North	Secondary	Employee	No	No	No	No	Yes
T239	Female	25	20-29	2	2	Negative	Negative	23.3	≥18.5 a 24.9	≤ 3 person/room	North	Secondary	Employee	No	No	No	No	Yes
T240	Female	14	14-19	2	1	Negative	Negative	21.2	≥18.5 a 24.9	≤ 3 person/room	North	Secondary	Unemployed	No	No	No	No	Yes
T241	Female	46	40-49	2	1	Negative	Negative	27.2	≥25 a 30	≤ 3 person/room	North	Secondary	Employee	No	No	No	No	Yes
T242	Female	48	40-49	2	15	Positive	Positive	23.5	≥18.5 a 24.9	≤ 3 person/room	North	Primary	Unemployed	No	No	No	No	Yes
T243	Male	29	20-29	3	1	Negative	Negative	22.2	≥18.5 a 24.9	≤ 3 person/room	North	Secondary	Employee	Yes	No	No	No	Yes
T244	Female	20	20-29	3	14	Positive	Negative	20.4	≥18.5 a 24.9	≤ 3 person/room	North	Secondary	Unemployed	No	No	No	No	Yes
T245	Male	17	14-19	1	1	Negative	Negative	25.8	≥25 a 30	≤ 3 person/room	North	Secondary	Unemployed	No	Yes	Yes	No	Yes
T246	Female	35	30-39	3	1	Negative	Negative	18.3	<18.5	≤ 3 person/room	North	Secondary	Unemployed	Yes	No	No	Moderate	Yes
T247	Female	65	60-69	3	26	Positive	Positive	22.4	≥18.5 a 24.9	≤ 3 person/room	North	Primary	Unemployed	Yes	No	No	No	Yes
T248	Male	64	60-69	3	1	Negative	Negative	20.8	≥18.5 a 24.9	≤ 3 person/room	North	Primary	Employee	No	Yes	Yes	Moderate	Yes
T249	Female	60	60-69	3	19	Positive	Positive	32	≥30	≤ 3 person/room	North	Secondary	Unemployed	No	No	No	No	Yes
T250	Male	55	50-59	2	1	Negative	Negative	25.8	≥25 a 30	≤ 3 person/room	North	Primary	Employee	Yes	Yes	Yes	Moderate	Yes
T251	Male	19	14-19	1	1	Negative	Negative	20.9	≥18.5 a 24.9	≤ 3 person/room	North	Post-secondary	Unemployed	No	No	No	Moderate	Yes
T252	Female	57	50-59	1	11	Positive	Negative	34.5	≥30	≤ 3 person/room	North	Primary	Unemployed	No	No	No	No	Yes
T253	Female	20	20-29	1	16	Positive	Positive	25	≥25 a 30	≤ 3 person/room	North	Post-secondary	Unemployed	Yes	No	No	Moderate	No
T254	Female	19	14-19	3	1	Negative	Negative	31.6	≥30	≤ 3 person/room	North	Secondary	Employee	No	No	No	No	No
T255	Male	64	60-69	3	15	Positive	Positive	22.4	≥18.5 a 24.9	≤ 3 person/room	North	Primary	Employee	No	No	No	Moderate	Yes
T256	Male	55	50-59	3	15	Positive	Positive	24.4	≥18.5 a 24.9	≤ 3 person/room	North	Secondary	Employee	Yes	No	No	No	Yes
T257	Male	38	30-39	3	14	Positive	Negative	25.7	≥25 a 30	≤ 3 person/room	North	Post-secondary	Employee	Yes	Yes	Yes	Moderate	Yes
T258	Female	56	50-59	3	1	Negative	Negative	32.4	≥30	≤ 3 person/room	North	Primary	Employee	No	Yes	Yes	Moderate	Yes
T259	Male	63	60-69	3	1	Negative	Negative	17.3	<18.5	≤ 3 person/room	North	Primary	Employee	Yes	No	No	No	Yes
T260	Male	52	50-59	1	16	Positive	Positive	28.4	≥25 a 30	≤ 3 person/room	North	Primary	Employee	Yes	No	No	No	Yes
T261	Female	52	50-59	2	16	Positive	Positive	28.7	≥25 a 30	≤ 3 person/room	North	Secondary	Employee	No	No	No	No	Yes
T262	Male	61	60-69	3	13	Positive	Negative	26.6	≥25 a 30	≤ 3 person/room	North	Secondary	Employee	No	Yes	Yes	Moderate	No
T263	Female	50	50-59	1	8	Negative	Negative	26.2	≥25 a 30	≤ 3 person/room	North	Secondary	Unemployed	Yes	No	No	No	Yes
T264	Male	42	40-49	3	1	Negative	Negative	23.9	≥18.5 a 24.9	≤ 3 person/room	North	Post-secondary	Employee	No	Yes	Yes	Moderate	Yes
T265	Female	43	40-49	3	1	Negative	Negative	30.5	≥30	≤ 3 person/room	North	Primary	Unemployed	No	No	No	No	No
T266	Male	34	30-39	1	1	Negative	Negative	25	≥25 a 30	≤ 3 person/room	North	Secondary	Unemployed	Yes	No	No	Moderate	Yes
T267	Female	23	20-29	2	1	Negative	Negative	22.7	≥18.5 a 24.9	≤ 3 person/room	North	Post-secondary	Employee	Yes	No	No	Moderate	Yes
T268	Female	20	20-29	1	1	Negative	Negative	21.6	≥18.5 a 24.9	≤ 3 person/room	North	Secondary	Employee	Yes	Yes	Yes	Moderate	Yes
T269	Female	47	40-49	3	1	Negative	Negative	24.8	≥18.5 a 24.9	≤ 3 person/room	North	Primary	Employee	No	No	No	No	Yes
T270	Female	52	50-59	3	1	Negative	Negative	24	≥18.5 a 24.9	≤ 3 person/room	North	Post-secondary	Unemployed	Yes	No	No	No	Yes
T271	Female	56	50-59	3	7	Negative	Negative	25.8	≥25 a 30	≤ 3 person/room	North	Primary	Employee	Yes	No	No	No	Yes
T272	Female	48	40-49	2	18	Positive	Positive	23.5	≥18.5 a 24.9	≤ 3 person/room	North	Primary	Unemployed	No	No	No	No	Yes
T273	Female	48	40-49	2	1	Negative	Negative	17.7	<18.5	≤ 3 person/room	North	Primary	Unemployed	Yes	No	No	No	Yes
T274	Female	24	20-29	2	1	Negative	Negative	23.2	≥18.5 a 24.9	≤ 3 person/room	North	Secondary	Unemployed	No	No	No	Moderate	Yes
T275	Female	34	30-39	2	4	Negative	Negative	23.1	≥18.5 a 24.9	≤ 3 person/room	North	Post-secondary	Unemployed	No	No	Yes	Moderate	No
T276	Female	39	30-39	2	13	Positive	Negative	34.4	≥30	≤ 3 person/room	North	Secondary	Unemployed	Yes	No	No	No	Yes
T277	Female	30	30-39	2	1	Negative	Negative	23.7	≥18.5 a 24.9	≤ 3 person/room	North	Secondary	Employee	No	No	No	No	Yes
T278	Female	53	50-59	3	6	Negative	Negative	24.9	≥18.5 a 24.9	≤ 3 person/room	North	Secondary	Unemployed	Yes	No	No	No	Yes
T279	Female	29	20-29	2	6	Negative	Negative	27.6	≥25 a 30	≤ 3 person/room	North	Secondary	Unemployed	No	No	No	No	No
T280	Female	45	40-49	3	12	Positive	Negative	24.97	≥25 a 30	≤ 3 person/room	North	Post-secondary	Employee	No	No	No	No	Yes
T281	Female	53	50-59	2	3	Negative	Negative	21.91	≥18.5 a 24.9	≤ 3 person/room	North	Primary	Unemployed	No	No	No	No	Yes
T282	Female	55	50-59	3	6	Negative	Negative	23.68	≥18.5 a 24.9	≤ 3 person/room	North	Primary	Employee	No	No	No	No	Yes
T283	Female	55	50-59	3	28	Positive	Positive	29	≥25 a 30	≤ 3 person/room	North	Primary	Unemployed	Yes	No	No	No	Yes
T284	Female	44	40-49	3	6	Negative	Negative	20.03	≥18.5 a 24.9	≤ 3 person/room	North	Post-secondary	Unemployed	Yes	No	No	No	Yes
T285	Female	53	50-59	3	1	Negative	Negative	30.36	≥30	≤ 3 person/room	North	Secondary	Employee	Yes	No	No	No	Yes
T286	Male	35	30-39	2	1	Negative	Negative	28.26	≥25 a 30	≤ 3 person/room	North	Post-secondary	Employee	No	No	No	No	Yes
T287	Female	29	20-29	2	1	Negative	Negative	27.7	≥25 a 30	≤ 3 person/room	North	Secondary	Unemployed	No	No	No	No	Yes
T288	Male	58	50-59	3	1	Negative	Negative	20.57	≥18.5 a 24.9	≤ 3 person/room	North	Secondary	Employee	Yes	No	No	No	Yes
T289	Male	43	40-49	3	17	Positive	Positive	27.73	≥25 a 30	≤ 3 person/room	North	Secondary	Employee	No	No	No	No	Yes
T290	Female	35	30-39	3	2	Negative	Negative	20.7	≥18.5 a 24.9	≤ 3 person/room	North	Secondary	Unemployed	Yes	No	No	Moderate	Yes
T291	Male	60	60-69	1	14	Positive	Negative	21.09	≥18.5 a 24.9	≤ 3 person/room	North	Secondary	Unemployed	Yes	Yes	Yes	Moderate	Yes
T292	Female	17	14-19	3	1	Negative	Negative	25	≥25 a 30	≤ 3 person/room	North	Secondary	Unemployed	No	No	No	No	Yes
T293	Female	44	40-49	3	1	Negative	Negative	24.35	≥18.5 a 24.9	≤ 3 person/room	North	Secondary	Unemployed	No	No	No	No	Yes
T294	Female	60	60-69	1	1	Negative	Negative	22.03	≥18.5 a 24.9	≤ 3 person/room	North	Primary	Unemployed	Yes	No	No	No	Yes
T295	Female	51	50-59	2	1	Negative	Negative	23.73	≥18.5 a 24.9	> 3 person/room	North	Secondary	Employee	No	No	No	No	Yes
T296	Female	53	50-59	1	1	Negative	Negative	23.94	≥18.5 a 24.9	≤ 3 person/room	Suburb	Primary	Unemployed	No	No	No	No	Yes
T297	Female	41	40-49	3	3	Negative	Negative	32.05	≥30	≤ 3 person/room	Suburb	Secondary	Unemployed	No	No	No	No	Yes
T298	Female	51	50-59	2	1	Negative	Negative	19.07	≥18.5 a 24.9	> 3 person/room	Suburb	Post-secondary	Employee	No	No	No	No	Yes
T299	Female	18	14-19	1	4	Negative	Negative	23.62	≥18.5 a 24.9	≤ 3 person/room	Suburb	Secondary	Unemployed	No	No	No	No	Yes
T300	Female	64	60-69	1	15	Positive	Positive	26.64	≥25 a 30	≤ 3 person/room	Suburb	Primary	Unemployed	No	No	No	No	Yes
T301	Female	51	50-59	1	8	Negative	Negative	23.83	≥18.5 a 24.9	≤ 3 person/room	Suburb	Primary	Employee	No	Yes	Yes	No	Yes
T302	Female	36	30-39	3	12	Positive	Negative	25.91	≥25 a 30	≤ 3 person/room	Suburb	Secondary	Unemployed	No	No	No	No	Yes
T303	Female	59	50-59	1	8	Negative	Negative	20.45	≥18.5 a 24.9	≤ 3 person/room	Suburb	Secondary	Unemployed	No	No	No	No	Yes
T304	Female	52	50-59	3	6	Negative	Negative	28.31	≥25 a 30	≤ 3 person/room	Suburb	Post-secondary	Employee	No	Yes	No	No	Yes
T305	Female	61	60-69	1	7	Negative	Negative	26.84	≥25 a 30	≤ 3 person/room	Suburb	Primary	Unemployed	No	Yes	No	No	Yes
T306	Female	64	60-69	1	12	Positive	Negative	25.85	≥25 a 30	≤ 3 person/room	Suburb	Primary	Unemployed	No	No	No	No	Yes
T307	Male	63	60-69	1	6	Negative	Negative	23.56	≥18.5 a 24.9	≤ 3 person/room	Suburb	Primary	Unemployed	No	No	No	No	Yes
T308	Female	36	30-39	1	1	Negative	Negative	23.92	≥18.5 a 24.9	≤ 3 person/room	Suburb	Secondary	Employee	No	No	No	Low	Yes
T309	Female	47	40-49	1	12	Positive	Negative	35.44	≥30	≤ 3 person/room	Suburb	Primary	Unemployed	No	No	No	No	Yes
T310	Male	53	50-59	1	1	Negative	Negative	20.2	≥18.5 a 24.9	≤ 3 person/room	Suburb	Post-secondary	Employee	No	No	No	No	Yes
T311	Male	51	50-59	1	8	Negative	Negative	29.38	≥25 a 30	≤ 3 person/room	Suburb	Primary	Employee	No	No	No	No	Yes
T312	Male	48	40-49	1	6	Negative	Negative	20.7	≥18.5 a 24.9	≤ 3 person/room	Suburb	Primary	Unemployed	Yes	Yes	Yes	No	Yes
T313	Female	57	50-59	1	17	Positive	Positive	21.5	≥18.5 a 24.9	≤ 3 person/room	Suburb	Primary	Unemployed	No	No	No	No	Yes
T314	Female	53	50-59	1	8	Negative	Negative	35.61	≥30	≤ 3 person/room	Suburb	Secondary	Unemployed	No	No	No	No	Yes
T315	Female	26	20-29	1	6	Negative	Negative	21.5	≥18.5 a 24.9	≤ 3 person/room	Suburb	Primary	Unemployed	Yes	No	No	No	Yes
T316	Female	51	50-59	1	7	Negative	Negative	25.33	≥25 a 30	≤ 3 person/room	Suburb	Primary	Unemployed	No	Yes	Yes	No	Yes
T317	Female	44	40-49	1	6	Negative	Negative	20.4	≥18.5 a 24.9	≤ 3 person/room	Suburb	Secondary	Employee	No	No	No	No	Yes
T318	Female	63	60-69	1	13	Positive	Negative	23.11	≥18.5 a 24.9	≤ 3 person/room	Suburb	Primary	Unemployed	No	No	No	No	Yes
T319	Female	55	50-59	3	5	Negative	Negative	24.97	≥25 a 30	≤ 3 person/room	Suburb	Post-secondary	Unemployed	No	No	No	No	Yes
T320	Female	44	40-49	1	4	Negative	Negative	23.92	≥18.5 a 24.9	≤ 3 person/room	Suburb	Secondary	Unemployed	No	No	No	No	Yes
T321	Male	61	60-69	1	4	Negative	Negative	16.48	<18.5	≤ 3 person/room	Suburb	Secondary	Unemployed	No	No	No	No	Yes
T322	Female	27	20-29	1	1	Negative	Negative	23.31	≥18.5 a 24.9	≤ 3 person/room	Suburb	Secondary	Employee	No	No	No	No	Yes
T323	Female	44	40-49	1	1	Negative	Negative	26.67	≥25 a 30	≤ 3 person/room	Suburb	Secondary	Unemployed	No	No	No	No	Yes
T324	Male	17	14-19	1	1	Negative	Negative	21.88	≥18.5 a 24.9	≤ 3 person/room	Suburb	Secondary	Unemployed	No	No	No	No	Yes
T325	Female	50	50-59	1	1	Negative	Negative	27.11	≥25 a 30	≤ 3 person/room	Suburb	Primary	Unemployed	No	No	No	No	Yes
T326	Female	25	20-29	1	1	Negative	Negative	31.18	≥30	≤ 3 person/room	Suburb	Secondary	Unemployed	No	No	No	No	Yes
T327	Female	60	60-69	1	13	Positive	Negative	28.07	≥25 a 30	≤ 3 person/room	Suburb	Primary	Unemployed	No	No	No	No	Yes
T328	Female	50	50-59	1	1	Negative	Negative	25.3	≥25 a 30	≤ 3 person/room	Suburb	Post-secondary	Employee	No	No	No	No	Yes
T329	Female	47	40-49	3	15	Positive	Positive	32.43	≥30	≤ 3 person/room	Suburb	Primary	Unemployed	No	No	No	No	Yes
T330	Female	50	50-59	1	17	Positive	Positive	39.66	≥30	≤ 3 person/room	Suburb	Primary	Unemployed	Yes	No	No	No	Yes
T331	Female	48	40-49	2	11	Positive	Negative	23.92	≥18.5 a 24.9	≤ 3 person/room	Suburb	Primary	Unemployed	No	No	No	No	Yes
T332	Female	49	40-49	3	4	Negative	Negative	24.89	≥18.5 a 24.9	≤ 3 person/room	Suburb	Primary	Unemployed	No	No	No	No	Yes
T333	Female	51	50-59	2	4	Negative	Negative	26.04	≥25 a 30	≤ 3 person/room	Suburb	Primary	Unemployed	No	No	No	No	Yes
T334	Female	36	30-39	1	1	Negative	Negative	21.33	≥18.5 a 24.9	≤ 3 person/room	Suburb	Secondary	Unemployed	Yes	Yes	Yes	No	Yes
T335	Female	48	40-49	1	6	Negative	Negative	28.55	≥25 a 30	≤ 3 person/room	Suburb	Secondary	Unemployed	No	No	No	Low	Yes
T336	Female	56	50-59	1	14	Positive	Negative	23.83	≥18.5 a 24.9	≤ 3 person/room	Suburb	Secondary	Employee	Yes	No	No	No	Yes
T337	Female	54	50-59	3	1	Negative	Negative	35.11	≥30	≤ 3 person/room	Suburb	Primary	Unemployed	Yes	No	No	No	Yes
T338	Male	45	40-49	2	14	Positive	Negative	25.91	≥25 a 30	≤ 3 person/room	Suburb	Primary	Unemployed	No	Yes	No	No	Yes
T339	Female	38	30-39	2	16	Positive	Positive	29.43	≥25 a 30	≤ 3 person/room	Suburb	Primary	Unemployed	No	No	No	No	Yes
T340	Male	23	20-29	3	4	Negative	Negative	21.31	≥18.5 a 24.9	≤ 3 person/room	Suburb	Secondary	Employee	No	Yes	No	No	Yes
T341	Female	50	50-59	1	4	Negative	Negative	24.86	≥18.5 a 24.9	≤ 3 person/room	Suburb	Primary	Unemployed	No	No	No	No	Yes
T342	Female	32	30-39	3	2	Negative	Negative	23.64	≥18.5 a 24.9	≤ 3 person/room	Suburb	Secondary	Employee	No	Yes	Yes	High	Yes
T343	Female	18	14-19	1	3	Negative	Negative	27.1	≥25 a 30	≤ 3 person/room	Suburb	Secondary	Employee	No	Yes	Yes	No	Yes
T344	Female	45	40-49	1	1	Negative	Negative	22.48	≥18.5 a 24.9	≤ 3 person/room	Suburb	Secondary	Employee	Yes	No	No	No	Yes
T345	Female	34	30-39	1	10	Positive	Negative	31.22	≥30	≤ 3 person/room	Suburb	Secondary	Employee	Yes	No	No	No	Yes
T346	Female	36	30-39	1	12	Positive	Negative	26.71	≥25 a 30	≤ 3 person/room	Suburb	Secondary	Unemployed	No	No	No	No	Yes
T347	Female	37	30-39	2	4	Negative	Negative	21.8	≥18.5 a 24.9	≤ 3 person/room	Suburb	Secondary	Employee	No	Yes	Yes	No	Yes
T348	Female	45	40-49	1	3	Negative	Negative	29.43	≥25 a 30	≤ 3 person/room	Suburb	Primary	Employee	No	No	No	No	Yes
T349	Female	40	40-49	1	2	Negative	Negative	21.72	≥18.5 a 24.9	≤ 3 person/room	Suburb	Secondary	Employee	No	Yes	No	Moderate	Yes
T350	Female	55	50-59	3	2	Negative	Negative	24.44	≥18.5 a 24.9	≤ 3 person/room	Suburb	Primary	Employee	No	No	No	No	Yes
T351	Female	61	60-69	1	12	Positive	Negative	40.46	≥30	≤ 3 person/room	Suburb	Secondary	Unemployed	Yes	No	No	No	Yes
T352	Female	41	40-49	1	3	Negative	Negative	32.47	≥30	≤ 3 person/room	Suburb	Secondary	Employee	Yes	No	No	No	Yes
T353	Female	44	40-49	1	2	Negative	Negative	27.41	≥25 a 30	≤ 3 person/room	Suburb	Primary	Unemployed	No	No	No	No	Yes
T354	Female	48	40-49	1	4	Negative	Negative	34.29	≥30	≤ 3 person/room	Suburb	Secondary	Employee	No	No	No	No	Yes
T355	Female	33	30-39	1	2	Negative	Negative	24.44	≥18.5 a 24.9	> 3 person/room	Suburb	Secondary	Employee	Yes	Yes	Yes	High	Yes
T356	Female	63	60-69	2	3	Negative	Negative	22.66	≥18.5 a 24.9	≤ 3 person/room	Suburb	Primary	Unemployed	No	No	No	No	Yes
T357	Female	40	40-49	3	1	Negative	Negative	28.76	≥25 a 30	≤ 3 person/room	Suburb	Secondary	Employee	No	No	No	No	Yes
T358	Female	35	30-39	3	2	Negative	Negative	23.15	≥18.5 a 24.9	≤ 3 person/room	Suburb	Primary	Unemployed	No	No	No	No	No
T359	Female	21	20-29	2	4	Negative	Negative	24.84	≥18.5 a 24.9	≤ 3 person/room	Suburb	Secondary	Unemployed	No	Yes	No	Moderate	No
T360	Female	27	20-29	2	5	Negative	Negative	24.88	≥18.5 a 24.9	> 3 person/room	Suburb	Primary	Unemployed	Yes	No	No	No	Yes
T361	Female	26	20-29	1	2	Negative	Negative	34.05	≥30	≤ 3 person/room	Suburb	Secondary	Unemployed	No	No	No	No	No
T362	Female	48	40-49	2	4	Negative	Negative	28.19	≥25 a 30	≤ 3 person/room	Suburb	Primary	Unemployed	Yes	No	No	No	Yes
T363	Female	51	50-59	2	3	Negative	Negative	25.1	≥25 a 30	≤ 3 person/room	Suburb	Secondary	Employee	No	Yes	Yes	No	Yes
T364	Female	45	40-49	1	2	Negative	Negative	23.92	≥18.5 a 24.9	> 3 person/room	Suburb	Secondary	Unemployed	No	No	No	No	No
T365	Male	58	50-59	1	4	Negative	Negative	24.77	≥18.5 a 24.9	≤ 3 person/room	Suburb	Primary	Employee	No	No	No	Moderate	Yes
T366	Female	65	60-69	1	3	Negative	Negative	23.83	≥18.5 a 24.9	≤ 3 person/room	Suburb	Primary	Employee	Yes	Yes	Yes	No	Yes
T367	Male	32	30-39	3	1	Negative	Negative	25.25	≥25 a 30	≤ 3 person/room	Suburb	Secondary	Employee	No	Yes	Yes	Moderate	Yes
T368	Female	40	40-49	1	2	Negative	Negative	24.03	≥18.5 a 24.9	≤ 3 person/room	Suburb	Secondary	Employee	Yes	No	No	No	Yes
T369	Female	65	60-69	2	3	Negative	Negative	28.4	≥25 a 30	≤ 3 person/room	Suburb	Primary	Unemployed	Yes	No	No	No	No
T370	Female	17	14-19	1	2	Negative	Negative	17.06	<18.5	≤ 3 person/room	Suburb	Secondary	Unemployed	No	No	No	No	No
T371	Female	40	40-49	2	4	Negative	Negative	23.05	≥18.5 a 24.9	≤ 3 person/room	Suburb	Secondary	Employee	No	No	No	No	Yes
T372	Male	46	40-49	1	3	Negative	Negative	22.53	≥18.5 a 24.9	≤ 3 person/room	Suburb	Primary	Employee	No	Yes	Yes	No	Yes
T373	Female	39	30-39	1	2	Negative	Negative	18.37	<18.5	≤ 3 person/room	Suburb	Secondary	Unemployed	No	No	No	No	Yes
T374	Female	62	60-69	1	15	Positive	Positive	29.75	≥25 a 30	≤ 3 person/room	Suburb	Secondary	Unemployed	No	No	No	No	Yes
T375	Female	55	50-59	1	3	Negative	Negative	27.18	≥25 a 30	≤ 3 person/room	Suburb	Primary	Unemployed	No	No	No	No	Yes
T376	Female	51	50-59	1	5	Negative	Negative	25.64	≥25 a 30	≤ 3 person/room	Suburb	Secondary	Employee	No	No	No	No	Yes
T377	Female	53	50-59	1	8	Negative	Negative	27.58	≥25 a 30	≤ 3 person/room	Suburb	Secondary	Unemployed	No	No	No	No	Yes
T378	Female	32	30-39	1	4	Negative	Negative	26.78	≥25 a 30	≤ 3 person/room	Suburb	Secondary	Unemployed	No	Yes	No	No	Yes
T379	Female	62	60-69	1	3	Negative	Negative	24.03	≥18.5 a 24.9	≤ 3 person/room	Suburb	Primary	Unemployed	Yes	No	No	Moderate	Yes
T380	Female	27	20-29	3	2	Negative	Negative	25.1	≥25 a 30	≤ 3 person/room	Suburb	Post-secondary	Employee	No	No	No	No	Yes
T381	Female	30	30-39	1	3	Negative	Negative	28.13	≥25 a 30	≤ 3 person/room	Suburb	Secondary	Employee	No	No	No	No	Yes
T382	Female	52	50-59	2	2	Negative	Negative	24.44	≥18.5 a 24.9	≤ 3 person/room	Suburb	Secondary	Employee	No	No	No	No	Yes
T383	Female	41	40-49	2	3	Negative	Negative	23.71	≥18.5 a 24.9	≤ 3 person/room	Suburb	Secondary	Unemployed	No	No	No	No	Yes
T384	Male	23	20-29	3	3	Negative	Negative	23.15	≥18.5 a 24.9	≤ 3 person/room	Suburb	Secondary	Employee	No	Yes	Yes	Moderate	Yes
T385	Female	38	30-39	3	2	Negative	Negative	25.39	≥25 a 30	≤ 3 person/room	Suburb	Secondary	Employee	No	No	No	No	No
T386	Male	51	50-59	1	2	Negative	Negative	24.22	≥18.5 a 24.9	≤ 3 person/room	Suburb	Primary	Employee	No	Yes	No	No	Yes
T387	Female	57	50-59	1	3	Negative	Negative	28.89	≥25 a 30	≤ 3 person/room	Suburb	Primary	Unemployed	No	No	No	No	No
T388	Male	57	50-59	1	4	Negative	Negative	27.94	≥25 a 30	≤ 3 person/room	Suburb	Primary	Employee	No	No	No	Moderate	Yes
T389	Male	26	20-29	2	2	Negative	Negative	22.86	≥18.5 a 24.9	≤ 3 person/room	Suburb	Primary	Employee	Yes	No	No	No	Yes
T390	Female	27	20-29	1	1	Negative	Negative	26.67	≥25 a 30	≤ 3 person/room	Suburb	Secondary	Unemployed	No	No	No	No	Yes
T391	Female	54	50-59	1	2	Negative	Negative	29.97	≥30	≤ 3 person/room	Suburb	Primary	Unemployed	Yes	No	No	No	Yes
T392	Female	42	40-49	1	2	Negative	Negative	25.15	≥25 a 30	≤ 3 person/room	Suburb	Primary	Unemployed	No	No	No	No	Yes
T393	Female	26	20-29	2	2	Negative	Negative	23.44	≥18.5 a 24.9	≤ 3 person/room	Suburb	Post-secondary	Unemployed	Yes	No	No	No	Yes
T394	Female	46	40-49	1	3	Negative	Negative	26.22	≥25 a 30	≤ 3 person/room	Suburb	Secondary	Unemployed	No	No	No	No	No
T395	Female	49	40-49	1	14	Positive	Negative	25.97	≥25 a 30	≤ 3 person/room	Suburb	Primary	Employee	No	No	No	No	Yes
T396	Female	25	20-29	1	2	Negative	Negative	33.71	≥30	≤ 3 person/room	Suburb	Post-secondary	Unemployed	No	No	No	No	Yes
T397	Female	56	50-59	1	4	Negative	Negative	24.97	≥25 a 30	≤ 3 person/room	Suburb	Primary	Employee	Yes	No	No	No	Yes
T398	Female	51	50-59	1	2	Negative	Negative	19.1	≥18.5 a 24.9	≤ 3 person/room	Suburb	Post-secondary	Unemployed	Yes	No	No	No	Yes
T399	Female	44	40-49	2	2	Negative	Negative	25.81	≥25 a 30	≤ 3 person/room	Suburb	Secondary	Unemployed	No	No	No	No	Yes
T400	Female	41	40-49	1	3	Negative	Negative	25.91	≥25 a 30	≤ 3 person/room	Suburb	Post-secondary	Employee	Yes	Yes	Yes	Moderate	Yes
T401	Female	60	60-69	1	2	Negative	Negative	40.89	≥30	≤ 3 person/room	Suburb	Secondary	Unemployed	No	No	No	No	Yes
T402	Female	58	50-59	1	2	Negative	Negative	27.34	≥25 a 30	> 3 person/room	Suburb	Primary	Unemployed	Yes	No	No	No	Yes
T403	Female	56	50-59	1	3	Negative	Negative	23.53	≥18.5 a 24.9	≤ 3 person/room	Suburb	Primary	Employee	Yes	No	No	No	Yes
T404	Male	16	14-19	3	2	Negative	Negative	20.7	≥18.5 a 24.9	≤ 3 person/room	Suburb	Primary	Unemployed	Yes	No	No	No	Yes
T405	Male	50	50-59	1	3	Negative	Negative	23.53	≥18.5 a 24.9	≤ 3 person/room	Suburb	Secondary	Unemployed	No	Yes	No	No	Yes
T406	Male	54	50-59	2	3	Negative	Negative	23.84	≥18.5 a 24.9	≤ 3 person/room	Suburb	Secondary	Employee	Yes	No	No	No	Yes
T407	Female	55	50-59	1	3	Negative	Negative	27.48	≥25 a 30	≤ 3 person/room	Suburb	Secondary	Unemployed	Yes	No	No	No	Yes
T408	Female	37	30-39	1	2	Negative	Negative	24.92	≥18.5 a 24.9	> 3 person/room	Suburb	Primary	Unemployed	No	No	No	No	Yes
T409	Female	58	50-59	1	2	Negative	Negative	23.78	≥18.5 a 24.9	≤ 3 person/room	Suburb	Primary	Employee	Yes	No	No	No	No
T410	Female	59	50-59	1	3	Negative	Negative	34.53	≥30	≤ 3 person/room	Suburb	Post-secondary	Employee	Yes	No	No	No	Yes
T411	Female	56	50-59	1	2	Negative	Negative	22.66	≥18.5 a 24.9	> 3 person/room	Suburb	Primary	Employee	No	No	No	No	Yes
T412	Female	42	40-49	1	11	Positive	Negative	26.37	≥25 a 30	≤ 3 person/room	Suburb	Post-secondary	Employee	Yes	No	No	No	Yes
T413	Female	47	40-49	1	2	Negative	Negative	25.78	≥25 a 30	> 3 person/room	Suburb	Primary	Employee	No	No	No	No	No
T414	Female	58	50-59	1	3	Negative	Negative	24.97	≥25 a 30	≤ 3 person/room	Suburb	Primary	Unemployed	No	No	No	No	No
T415	Female	34	30-39	1	2	Negative	Negative	27.11	≥25 a 30	≤ 3 person/room	Suburb	Secondary	Employee	No	No	No	No	Yes
T416	Female	57	50-59	1	2	Negative	Negative	22.86	≥18.5 a 24.9	≤ 3 person/room	Suburb	Secondary	Unemployed	No	No	No	No	Yes
T417	Female	15	14-19	1	3	Negative	Negative	21.78	≥18.5 a 24.9	≤ 3 person/room	Suburb	Secondary	Unemployed	Yes	No	No	No	Yes
T418	Female	39	30-39	1	2	Negative	Negative	24.84	≥18.5 a 24.9	≤ 3 person/room	Suburb	Secondary	Unemployed	No	No	No	No	Yes
T419	Female	39	30-39	1	1	Negative	Negative	20.83	≥18.5 a 24.9	≤ 3 person/room	Suburb	Post-secondary	Unemployed	No	No	No	No	Yes
T420	Female	34	30-39	1	12	Positive	Negative	25.44	≥25 a 30	≤ 3 person/room	Suburb	Primary	Unemployed	Yes	No	No	No	No
T421	Female	30	30-39	2	3	Negative	Negative	24.11	≥18.5 a 24.9	≤ 3 person/room	Suburb	Primary	Employee	No	No	No	No	Yes
T422	Male	61	60-69	1	4	Negative	Negative	25.62	≥25 a 30	≤ 3 person/room	Suburb	Secondary	Unemployed	Yes	Yes	Yes	No	Yes
T423	Female	21	20-29	1	3	Negative	Negative	24.65	≥18.5 a 24.9	≤ 3 person/room	Suburb	Secondary	Unemployed	No	No	No	No	No
T424	Female	48	40-49	1	12	Positive	Negative	21.05	≥18.5 a 24.9	≤ 3 person/room	Suburb	Secondary	Employee	Yes	No	No	No	Yes
T425	Female	54	50-59	1	2	Negative	Negative	21.91	≥18.5 a 24.9	≤ 3 person/room	Suburb	Primary	Unemployed	Yes	No	No	No	Yes
T426	Female	52	50-59	2	3	Negative	Negative	23.53	≥18.5 a 24.9	≤ 3 person/room	Suburb	Primary	Employee	No	No	No	No	No
T427	Male	50	50-59	1	1	Negative	Negative	26.67	≥25 a 30	≤ 3 person/room	Suburb	Primary	Employee	No	No	No	No	Yes
T428	Female	32	30-39	2	2	Negative	Negative	29.9	≥25 a 30	≤ 3 person/room	Suburb	Secondary	Employee	No	Yes	No	No	Yes
T429	Male	44	40-49	1	4	Negative	Negative	25.47	≥25 a 30	≤ 3 person/room	Suburb	Primary	Unemployed	No	Yes	Yes	No	Yes
T430	Female	54	50-59	1	3	Negative	Negative	26.14	≥25 a 30	≤ 3 person/room	Suburb	Primary	Unemployed	No	No	No	No	Yes
T431	Female	49	40-49	1	2	Negative	Negative	23.92	≥18.5 a 24.9	≤ 3 person/room	Suburb	Primary	Unemployed	No	Yes	No	No	Yes
T432	Female	65	60-69	1	3	Negative	Negative	32.46	≥30	≤ 3 person/room	Suburb	Primary	Employee	Yes	Yes	Yes	Moderate	Yes
T433	Female	62	60-69	1	4	Negative	Negative	28.84	≥25 a 30	≤ 3 person/room	Suburb	Secondary	Unemployed	No	Yes	No	No	Yes
T434	Female	53	50-59	2	3	Negative	Negative	24.34	≥18.5 a 24.9	≤ 3 person/room	Suburb	Secondary	Unemployed	Yes	No	No	No	Yes
T435	Female	60	60-69	1	5	Negative	Negative	21.64	≥18.5 a 24.9	≤ 3 person/room	Suburb	Primary	Unemployed	Yes	No	No	No	Yes
T436	Female	29	20-29	2	3	Negative	Negative	30.1	≥30	≤ 3 person/room	Suburb	Secondary	Unemployed	Yes	No	No	No	Yes
T437	Male	37	30-39	2	2	Negative	Negative	23.66	≥18.5 a 24.9	≤ 3 person/room	Suburb	Secondary	Employee	No	Yes	No	Moderate	Yes
T438	Female	42	40-49	1	4	Negative	Negative	23.73	≥18.5 a 24.9	≤ 3 person/room	Suburb	Primary	Unemployed	No	No	No	No	Yes
T439	Female	61	60-69	1	13	Positive	Negative	28.84	≥25 a 30	≤ 3 person/room	Suburb	Primary	Employee	No	No	No	No	Yes
T440	Male	56	50-59	1	2	Negative	Negative	20.03	≥18.5 a 24.9	≤ 3 person/room	Suburb	Primary	Unemployed	Yes	Yes	No	No	Yes
T441	Female	41	40-49	2	3	Negative	Negative	22.27	≥18.5 a 24.9	≤ 3 person/room	Suburb	Secondary	Unemployed	Yes	No	No	No	Yes
T442	Female	61	60-69	1	12	Positive	Negative	25.04	≥25 a 30	≤ 3 person/room	Suburb	Primary	Employee	Yes	No	No	No	Yes
T443	Female	66	60-69	2	4	Negative	Negative	26.35	≥25 a 30	≤ 3 person/room	Suburb	Secondary	Unemployed	No	Yes	No	Low	Yes
T444	Female	51	50-59	2	3	Negative	Negative	24.97	≥25 a 30	≤ 3 person/room	Suburb	Secondary	Employee	Yes	No	No	No	Yes
T445	Female	60	60-69	2	2	Negative	Negative	24.61	≥18.5 a 24.9	≤ 3 person/room	Suburb	Post-secondary	Unemployed	No	No	No	No	Yes
T446	Female	54	50-59	1	3	Negative	Negative	26.16	≥25 a 30	≤ 3 person/room	Suburb	Primary	Employee	No	No	No	No	No
T447	Male	56	50-59	1	9	Negative	Negative	30.49	≥30	≤ 3 person/room	Suburb	Primary	Unemployed	No	Yes	Yes	High	Yes
T448	Female	50	50-59	2	2	Negative	Negative	23.8	≥18.5 a 24.9	≤ 3 person/room	Suburb	Primary	Employee	Yes	No	No	No	Yes
T449	Male	30	30-39	3	15	Positive	Positive	19.93	≥18.5 a 24.9	≤ 3 person/room	Suburb	Post-secondary	Employee	Yes	No	No	No	Yes
T450	Female	30	30-39	3	1	Negative	Negative	19.78	≥18.5 a 24.9	≤ 3 person/room	Central	Secondary	Employee	Yes	No	No	No	No
T451	Female	56	50-59	3	9	Negative	Negative	32.05	≥30	≤ 3 person/room	Central	Secondary	Unemployed	No	No	No	No	Yes
T452	Female	61	60-69	3	5	Negative	Negative	26.49	≥25 a 30	≤ 3 person/room	Central	Secondary	Unemployed	No	No	No	No	Yes
T453	Male	57	50-59	3	10	Positive	Negative	25.83	≥25 a 30	≤ 3 person/room	Central	Primary	Employee	No	No	No	Low	Yes
T454	Female	62	60-69	2	5	Negative	Negative	21.48	≥18.5 a 24.9	≤ 3 person/room	North	Primary	Employee	No	No	No	No	Yes
T455	Female	44	40-49	1	4	Negative	Negative	23.53	≥18.5 a 24.9	> 3 person/room	Central	Primary	Unemployed	No	No	No	No	Yes
T456	Female	23	20-29	3	3	Negative	Negative	21.83	≥18.5 a 24.9	≤ 3 person/room	Central	Primary	Unemployed	No	No	No	No	Yes
T457	Female	31	30-39	1	5	Negative	Negative	22.48	≥18.5 a 24.9	≤ 3 person/room	North	Secondary	Employee	No	No	No	Low	Yes
T458	Male	51	50-59	2	16	Positive	Positive	27.18	≥25 a 30	≤ 3 person/room	North	Primary	Employee	No	No	No	No	Yes
T459	Male	38	30-39	1	11	Positive	Negative	25.39	≥25 a 30	≤ 3 person/room	North	Post-secondary	Employee	No	No	No	No	No
T460	Male	24	20-29	3	5	Negative	Negative	22.84	≥18.5 a 24.9	> 3 person/room	Suburb	Post-secondary	Employee	No	No	No	No	Yes
T461	Female	50	50-59	2	6	Negative	Negative	29.14	≥25 a 30	> 3 person/room	North	Secondary	Unemployed	No	No	No	No	Yes
T462	Female	33	30-39	2	5	Negative	Negative	27.27	≥25 a 30	≤ 3 person/room	North	Secondary	Unemployed	No	No	No	Low	Yes
T463	Female	54	50-59	2	20	Positive	Positive	24.34	≥18.5 a 24.9	≤ 3 person/room	Central	Secondary	Unemployed	Yes	Yes	No	Low	Yes
T464	Female	59	50-59	2	15	Positive	Positive	22.19	≥18.5 a 24.9	≤ 3 person/room	North	Secondary	Unemployed	No	No	No	No	Yes
T465	Female	41	40-49	1	2	Negative	Negative	33.75	≥30	≤ 3 person/room	Suburb	Primary	Unemployed	No	No	No	No	Yes
T466	Female	51	50-59	3	30	Positive	Positive	31.22	≥30	≤ 3 person/room	North	Primary	Employee	No	Yes	Yes	No	Yes
T467	Female	58	50-59	2	20	Positive	Positive	29.05	≥25 a 30	≤ 3 person/room	Central	Primary	Employee	No	No	No	Low	Yes
T468	Female	44	40-49	1	6	Negative	Negative	23.83	≥18.5 a 24.9	≤ 3 person/room	Suburb	Secondary	Unemployed	No	No	No	No	Yes
T469	Female	44	40-49	3	10	Positive	Negative	28.89	≥25 a 30	≤ 3 person/room	North	Secondary	Unemployed	No	No	No	No	Yes
T470	Female	21	20-29	2	1	Negative	Negative	33.98	≥30	≤ 3 person/room	Central	Secondary	Unemployed	Yes	No	No	Low	Yes
T471	Female	31	30-39	2	1	Negative	Negative	24.34	≥18.5 a 24.9	≤ 3 person/room	Central	Primary	Unemployed	No	No	No	No	Yes
T472	Female	45	40-49	2	8	Negative	Negative	26.56	≥25 a 30	≤ 3 person/room	North	Primary	Unemployed	No	No	No	No	Yes
T473	Female	46	40-49	3	1	Negative	Negative	19.53	≥18.5 a 24.9	≤ 3 person/room	Central	Secondary	Unemployed	No	No	No	No	Yes
T474	Female	50	50-59	1	24	Positive	Positive	27.24	≥25 a 30	≤ 3 person/room	Suburb	Post-secondary	Unemployed	Yes	Yes	Yes	Low	Yes
T475	Female	46	40-49	3	4	Negative	Negative	32.77	≥30	≤ 3 person/room	Central	Secondary	Employee	Yes	No	No	Low	Yes
T476	Female	33	30-39	3	21	Positive	Positive	22.58	≥18.5 a 24.9	≤ 3 person/room	Central	Secondary	Employee	Yes	No	No	No	No
T477	Female	51	50-59	2	25	Positive	Positive	19.96	≥18.5 a 24.9	≤ 3 person/room	North	Secondary	Unemployed	No	No	No	No	Yes
T478	Female	45	40-49	3	24	Positive	Positive	26.67	≥25 a 30	≤ 3 person/room	Central	Secondary	Unemployed	No	Yes	Yes	Moderate	Yes
T479	Female	51	50-59	2	3	Negative	Negative	28.44	≥25 a 30	≤ 3 person/room	Suburb	Primary	Unemployed	Yes	No	No	No	No
T480	Female	53	50-59	3	7	Negative	Negative	27.73	≥25 a 30	≤ 3 person/room	Central	Secondary	Employee	Yes	No	No	No	Yes
T481	Male	65	60-69	2	15	Positive	Positive	18.38	<18.5	≤ 3 person/room	Central	Primary	Unemployed	No	Yes	Yes	No	Yes
T482	Male	56	50-59	3	15	Positive	Positive	22.58	≥18.5 a 24.9	≤ 3 person/room	Central	Secondary	Employee	No	No	No	Low	No
T483	Female	51	50-59	2	20	Positive	Positive	26.16	≥25 a 30	≤ 3 person/room	North	Secondary	Unemployed	No	No	No	No	Yes
T484	Female	47	40-49	2	4	Negative	Negative	18.37	<18.5	≤ 3 person/room	Suburb	Post-secondary	Employee	Yes	No	No	No	Yes
T485	Female	33	30-39	1	3	Negative	Negative	21.94	≥18.5 a 24.9	≤ 3 person/room	North	Secondary	Employee	No	No	No	No	Yes
T486	Female	31	30-39	2	3	Negative	Negative	25.39	≥25 a 30	≤ 3 person/room	North	Secondary	Unemployed	No	No	No	No	Yes
T487	Male	62	60-69	1	23	Positive	Positive	29.36	≥25 a 30	≤ 3 person/room	Suburb	Primary	Employee	No	No	No	No	Yes
T488	Male	57	50-59	3	23	Positive	Positive	29.38	≥25 a 30	≤ 3 person/room	North	Secondary	Employee	Yes	No	No	No	Yes
T489	Female	46	40-49	3	1	Negative	Negative	23.59	≥18.5 a 24.9	≤ 3 person/room	North	Secondary	Unemployed	No	Yes	No	No	Yes
T490	Female	48	40-49	1	23	Positive	Positive	24.61	≥18.5 a 24.9	≤ 3 person/room	Suburb	Primary	Unemployed	Yes	No	No	No	Yes
T491	Female	52	50-59	1	16	Positive	Positive	36.36	≥30	≤ 3 person/room	Suburb	Post-secondary	Employee	No	No	No	No	Yes
T492	Male	48	40-49	2	23	Positive	Positive	33.75	≥30	≤ 3 person/room	North	Primary	Employee	Yes	No	No	No	Yes
T493	Female	48	40-49	2	23	Positive	Positive	23.73	≥18.5 a 24.9	≤ 3 person/room	North	Primary	Unemployed	No	No	No	Low	Yes
T494	Female	57	50-59	2	1	Negative	Negative	20.7	≥18.5 a 24.9	≤ 3 person/room	North	Primary	Unemployed	No	No	No	No	Yes
T495	Female	43	40-49	1	8	Negative	Negative	27.7	≥25 a 30	> 3 person/room	Suburb	Primary	Unemployed	No	No	No	No	Yes
T496	Male	46	40-49	1	30	Positive	Positive	21.3	≥18.5 a 24.9	≤ 3 person/room	Suburb	Primary	Employee	No	Yes	Yes	No	Yes
T497	Female	62	60-69	2	6	Negative	Negative	25.91	≥25 a 30	≤ 3 person/room	North	Post-secondary	Unemployed	No	No	No	No	Yes
T498	Female	45	40-49	2	5	Negative	Negative	25.91	≥25 a 30	≤ 3 person/room	North	Secondary	Employee	Yes	No	No	No	Yes
T499	Female	55	50-59	2	7	Negative	Negative	25.95	≥25 a 30	≤ 3 person/room	North	Primary	Employee	No	No	No	No	Yes
T500	Female	29	20-29	1	4	Negative	Negative	28.91	≥25 a 30	≤ 3 person/room	Suburb	Secondary	Unemployed	No	No	No	No	Yes
T501	Female	32	30-39	2	5	Negative	Negative	25.63	≥25 a 30	≤ 3 person/room	North	Secondary	Employee	No	No	No	No	Yes
T502	Female	55	50-59	2	11	Positive	Negative	23.61	≥18.5 a 24.9	≤ 3 person/room	Suburb	Secondary	Employee	No	Yes	Yes	Low	Yes
T503	Male	45	40-49	1	17	Positive	Positive	21.64	≥18.5 a 24.9	≤ 3 person/room	Suburb	Primary	Employee	Yes	No	No	No	Yes
T504	Female	48	40-49	2	14	Positive	Negative	29.33	≥25 a 30	≤ 3 person/room	North	Primary	Unemployed	Yes	Yes	No	No	Yes
T505	Female	51	50-59	1	17	Positive	Positive	33.98	≥30	≤ 3 person/room	Suburb	Primary	Unemployed	No	No	No	No	Yes
T506	Female	42	40-49	2	1	Negative	Negative	22.51	≥18.5 a 24.9	≤ 3 person/room	North	Post-secondary	Employee	No	No	No	No	Yes
T507	Female	25	20-29	2	14	Positive	Negative	20.96	≥18.5 a 24.9	≤ 3 person/room	North	Secondary	Employee	Yes	No	No	No	Yes
T508	Female	47	40-49	2	4	Negative	Negative	25.39	≥25 a 30	≤ 3 person/room	North	Secondary	Employee	No	No	No	No	Yes
T509	Female	52	50-59	2	18	Positive	Positive	28.13	≥25 a 30	≤ 3 person/room	North	Primary	Unemployed	No	No	No	No	Yes
T510	Female	42	40-49	1	11	Positive	Negative	30.48	≥30	≤ 3 person/room	Suburb	Primary	Employee	No	No	No	No	No
T511	Male	36	30-39	2	17	Positive	Positive	20.48	≥18.5 a 24.9	≤ 3 person/room	Central	Secondary	Employee	Yes	No	No	No	No
T512	Male	53	50-59	2	18	Positive	Positive	22.34	≥18.5 a 24.9	≤ 3 person/room	North	Primary	Employee	No	Yes	Yes	No	Yes
T513	Male	52	50-59	1	4	Negative	Negative	26.81	≥25 a 30	≤ 3 person/room	Suburb	Secondary	Employee	Yes	No	No	Low	No
T514	Female	19	14-19	1	15	Positive	Positive	19.82	≥18.5 a 24.9	≤ 3 person/room	Suburb	Secondary	Unemployed	No	Yes	Yes	Low	Yes
T515	Female	59	50-59	2	15	Positive	Positive	25.78	≥25 a 30	≤ 3 person/room	North	Primary	Unemployed	No	No	No	No	Yes
T516	Female	40	40-49	1	4	Negative	Negative	32.46	≥30	≤ 3 person/room	North	Secondary	Employee	No	No	No	Low	Yes
T517	Female	25	20-29	1	12	Positive	Negative	22.35	≥18.5 a 24.9	≤ 3 person/room	Suburb	Secondary	Employee	No	Yes	Yes	Low	Yes
T518	Female	36	30-39	1	17	Positive	Positive	28.25	≥25 a 30	> 3 person/room	Suburb	Primary	Employee	Yes	No	No	No	Yes
T519	Female	22	20-29	2	1	Negative	Negative	26.67	≥25 a 30	≤ 3 person/room	North	Post-secondary	Employee	Yes	No	No	No	No
T520	Female	24	20-29	2	5	Negative	Negative	26.04	≥25 a 30	≤ 3 person/room	North	Secondary	Employee	No	No	No	No	Yes
T521	Female	43	40-49	1	9	Negative	Negative	25	≥18.5 a 24.9	≤ 3 person/room	Suburb	Secondary	Employee	Yes	No	No	No	Yes
T522	Female	49	40-49	1	1	Negative	Negative	29	≥25 a 30	≤ 3 person/room	Suburb	Primary	Unemployed	No	No	No	No	Yes
T523	Female	38	30-39	1	18	Positive	Positive	36.52	≥30	≤ 3 person/room	North	Secondary	Employee	Yes	No	No	No	Yes
T524	Male	52	50-59	2	6	Negative	Negative	24.57	≥18.5 a 24.9	≤ 3 person/room	North	Post-secondary	Unemployed	No	No	No	No	Yes
T525	Male	59	50-59	1	11	Positive	Negative	25.06	≥25 a 30	≤ 3 person/room	Central	Post-secondary	Employee	Yes	No	No	High	Yes
T526	Male	47	40-49	2	17	Positive	Positive	23.67	≥18.5 a 24.9	≤ 3 person/room	Suburb	Secondary	Unemployed	No	Yes	Yes	No	Yes
T527	Female	46	40-49	1	13	Positive	Negative	34.13	≥30	> 3 person/room	Suburb	Primary	Unemployed	No	No	No	No	Yes
T528	Female	49	40-49	2	8	Negative	Negative	30.75	≥30	≤ 3 person/room	North	Primary	Unemployed	Yes	No	No	No	Yes
T529	Female	45	40-49	2	31	Positive	Positive	27.34	≥25 a 30	≤ 3 person/room	North	Primary	Unemployed	Yes	No	No	Low	Yes
T530	Male	57	50-59	1	8	Negative	Negative	18.37	<18.5	≤ 3 person/room	Suburb	Primary	Employee	Yes	No	No	Low	No
T531	Female	54	50-59	1	6	Negative	Negative	32.81	≥30	≤ 3 person/room	Suburb	Primary	Employee	No	No	No	No	Yes
T532	Female	54	50-59	1	1	Negative	Negative	29.33	≥25 a 30	≤ 3 person/room	Suburb	Primary	Unemployed	Yes	No	No	No	Yes
T533	Female	50	50-59	2	7	Negative	Negative	36.44	≥30	≤ 3 person/room	North	Secondary	Unemployed	No	No	No	No	No
T534	Female	57	50-59	2	22	Positive	Positive	23.71	≥18.5 a 24.9	≤ 3 person/room	North	Secondary	Unemployed	No	No	No	Low	Yes
T535	Female	64	60-69	1	7	Negative	Negative	28.57	≥25 a 30	≤ 3 person/room	Suburb	Primary	Unemployed	No	No	No	No	No
T536	Male	57	50-59	3	11	Positive	Negative	20.07	≥18.5 a 24.9	≤ 3 person/room	Suburb	Secondary	Employee	Yes	No	No	No	Yes
T537	Female	35	30-39	3	18	Positive	Positive	25.16	≥25 a 30	≤ 3 person/room	Central	Primary	Employee	No	No	No	No	Yes
T538	Female	50	50-59	2	3	Negative	Negative	39.35	≥30	≤ 3 person/room	Central	Secondary	Unemployed	Yes	No	No	No	Yes
T539	Female	52	50-59	2	14	Positive	Negative	26.3	≥25 a 30	≤ 3 person/room	Central	Primary	Employee	No	No	No	No	Yes
T540	Female	54	50-59	3	1	Negative	Negative	19.53	≥18.5 a 24.9	≤ 3 person/room	Central	Secondary	Unemployed	No	Yes	Yes	No	Yes
T541	Female	24	20-29	2	22	Positive	Positive	24	≥18.5 a 24.9	≤ 3 person/room	Central	Secondary	Unemployed	No	No	No	No	Yes
T542	Female	63	60-69	1	18	Positive	Positive	26.56	≥25 a 30	≤ 3 person/room	Central	Primary	Employee	No	No	No	No	Yes
T543	Female	67	60-69	3	28	Positive	Positive	27.7	≥25 a 30	≤ 3 person/room	Central	Primary	Employee	Yes	No	No	No	Yes
T544	Female	18	14-19	3	2	Negative	Negative	27.43	≥25 a 30	≤ 3 person/room	Central	Secondary	Unemployed	No	No	No	No	Yes
T545	Female	59	50-59	3	10	Positive	Negative	32.44	≥30	≤ 3 person/room	Central	Primary	Unemployed	No	No	No	No	Yes
T546	Male	53	50-59	2	5	Negative	Negative	22.94	≥18.5 a 24.9	≤ 3 person/room	Central	Primary	Employee	No	No	No	No	Yes
T547	Male	55	50-59	3	31	Positive	Positive	31.14	≥30	≤ 3 person/room	Central	Secondary	Employee	No	No	No	No	No
T548	Female	48	40-49	3	22	Positive	Positive	28.36	≥25 a 30	≤ 3 person/room	Central	Secondary	Employee	Yes	No	No	No	Yes
T549	Female	57	50-59	3	20	Positive	Positive	24.99	≥25 a 30	≤ 3 person/room	Central	Primary	Employee	No	No	No	No	Yes
T550	Female	25	20-29	3	1	Negative	Negative	30.39	≥30	≤ 3 person/room	Central	Primary	Employee	No	No	No	No	Yes
T551	Female	50	50-59	1	25	Positive	Positive	23.34	≥18.5 a 24.9	≤ 3 person/room	Central	Primary	Employee	No	No	No	No	Yes
T552	Female	65	60-69	3	36	Positive	Positive	24.14	≥18.5 a 24.9	≤ 3 person/room	Central	Secondary	Employee	No	No	No	No	Yes
T553	Female	50	50-59	3	19	Positive	Positive	34.08	≥30	≤ 3 person/room	Central	Secondary	Unemployed	No	No	No	No	No
T554	Female	60	60-69	1	2	Negative	Negative	23.44	≥18.5 a 24.9	≤ 3 person/room	Central	Primary	Employee	No	Yes	Yes	No	Yes
T555	Male	57	50-59	3	10	Positive	Negative	26.45	≥25 a 30	> 3 person/room	Central	Post-secondary	Employee	Yes	Yes	Yes	No	Yes
T556	Female	34	30-39	2	2	Negative	Negative	34.19	≥30	≤ 3 person/room	Central	Secondary	Unemployed	No	No	No	No	Yes
T557	Female	58	50-59	3	3	Negative	Negative	23.71	≥18.5 a 24.9	≤ 3 person/room	Central	Primary	Unemployed	No	No	No	No	No
T558	Female	42	40-49	3	23	Positive	Positive	27.34	≥25 a 30	≤ 3 person/room	Central	Secondary	Employee	No	No	No	No	Yes
T559	Female	59	50-59	3	10	Positive	Negative	28.48	≥25 a 30	≤ 3 person/room	Central	Secondary	Employee	No	No	No	No	Yes
T560	Female	35	30-39	2	1	Negative	Negative	29	≥25 a 30	> 3 person/room	Central	Secondary	Unemployed	No	No	No	No	Yes
T561	Female	51	50-59	2	1	Negative	Negative	31.19	≥30	≤ 3 person/room	Central	Secondary	Employee	No	No	No	No	Yes
T562	Female	39	30-39	2	20	Positive	Positive	27.06	≥25 a 30	≤ 3 person/room	Central	Secondary	Employee	No	No	No	No	Yes
T563	Female	30	30-39	3	16	Positive	Positive	20.2	≥18.5 a 24.9	≤ 3 person/room	Central	Secondary	Employee	No	No	No	No	Yes
T564	Male	43	40-49	2	15	Positive	Positive	26.06	≥25 a 30	≤ 3 person/room	Central	Primary	Employee	No	No	No	No	Yes
T565	Female	53	50-59	3	2	Negative	Negative	26.45	≥25 a 30	≤ 3 person/room	Central	Primary	Unemployed	No	No	No	No	Yes
T566	Female	67	60-69	3	2	Negative	Negative	29.43	≥25 a 30	≤ 3 person/room	Central	Primary	Unemployed	Yes	No	No	No	Yes
T567	Female	52	50-59	3	28	Positive	Positive	31.63	≥30	≤ 3 person/room	Central	Primary	Employee	No	No	No	No	Yes
T568	Female	49	40-49	3	1	Negative	Negative	29.02	≥25 a 30	≤ 3 person/room	Central	Primary	Unemployed	No	No	No	No	Yes
T569	Male	56	50-59	2	10	Positive	Negative	32.47	≥30	≤ 3 person/room	Central	Secondary	Employee	Yes	No	No	No	Yes
T570	Female	37	30-39	2	6	Negative	Negative	24.65	≥18.5 a 24.9	≤ 3 person/room	Central	Secondary	Employee	No	No	No	No	Yes
T571	Female	41	40-49	3	2	Negative	Negative	18.08	<18.5	≤ 3 person/room	Central	Secondary	Unemployed	No	No	No	No	No
T572	Female	30	30-39	3	23	Positive	Positive	20.13	≥18.5 a 24.9	> 3 person/room	Central	Secondary	Employee	Yes	No	No	No	No
T573	Female	47	40-49	3	20	Positive	Positive	27.12	≥25 a 30	≤ 3 person/room	Central	Primary	Unemployed	No	No	No	No	No
T574	Female	57	50-59	3	2	Negative	Negative	30.33	≥30	≤ 3 person/room	Central	Secondary	Unemployed	Yes	No	No	No	Yes
T575	Male	50	50-59	2	13	Positive	Negative	27.1	≥25 a 30	≤ 3 person/room	Central	Primary	Employee	Yes	Yes	No	Low	Yes
T576	Male	40	40-49	3	3	Negative	Negative	23.44	≥18.5 a 24.9	≤ 3 person/room	Central	Secondary	Employee	Yes	No	No	No	No
T577	Male	69	60-69	3	12	Positive	Negative	21.48	≥18.5 a 24.9	≤ 3 person/room	Central	Primary	Employee	No	No	No	No	Yes
T578	Female	37	30-39	3	3	Negative	Negative	29.64	≥25 a 30	≤ 3 person/room	Central	Post-secondary	Employee	Yes	No	No	No	Yes
T579	Female	52	50-59	3	2	Negative	Negative	28.25	≥25 a 30	≤ 3 person/room	Central	Secondary	Employee	No	No	No	No	Yes
T580	Female	40	40-49	3	2	Negative	Negative	22.06	≥18.5 a 24.9	≤ 3 person/room	Central	Secondary	Unemployed	No	No	No	No	Yes
T581	Male	58	50-59	2	2	Negative	Negative	25.71	≥25 a 30	≤ 3 person/room	Central	Primary	Employee	No	No	No	No	Yes
T582	Female	70	60-69	3	14	Positive	Negative	23.53	≥18.5 a 24.9	≤ 3 person/room	Central	Post-secondary	Unemployed	Yes	Yes	Yes	No	Yes
T583	Female	18	14-19	2	2	Negative	Negative	24.14	≥18.5 a 24.9	> 3 person/room	Central	Primary	Unemployed	Yes	No	No	No	Yes
T584	Female	70	60-69	2	1	Negative	Negative	22.83	≥18.5 a 24.9	≤ 3 person/room	Central	Primary	Unemployed	Yes	No	No	No	No
T585	Female	58	50-59	3	12	Positive	Negative	23.37	≥18.5 a 24.9	≤ 3 person/room	Central	Primary	Employee	Yes	No	No	No	No
T586	Male	27	20-29	1	1	Negative	Negative	23.95	≥18.5 a 24.9	≤ 3 person/room	Central	Secondary	Unemployed	Yes	No	No	No	Yes
T587	Female	15	14-19	2	20	Positive	Positive	22.22	≥18.5 a 24.9	≤ 3 person/room	Central	Secondary	Unemployed	No	No	No	No	Yes
T588	Female	52	50-59	1	2	Negative	Negative	31.24	≥30	≤ 3 person/room	Central	Primary	Employee	No	No	No	No	Yes
T589	Female	43	40-49	2	1	Negative	Negative	29.69	≥25 a 30	≤ 3 person/room	Central	Primary	Employee	No	No	No	No	Yes
