# Supplementary material for: Prevalence of and risk factors associated with latent tuberculosis infection in a Latin American region
Source: PeerJ journal article supplement (doi:10.7717/peerj.9429), 2020-08-12
Supplement: Supplemental_Table_S1.docx [file Supplemental_Table_S1.docx]

| Age (years) |  | Male | |  |  | Female | |  | OR (95% CI) | *p* |
| --- | --- | --- | --- | --- | --- | --- | --- | --- | --- | --- |
| **N** | **TST-positive**  ***n* %** | | ***p*** | **N** | **TST-positive**  ***n* %** | | ***p*** |
| 14-19 | 12 | 0 | 0 |  | 19 | 2 | 10.5 |  | ------ | 0.510* |
| 20-29 | 11 | 0 | 0 |  | 63 | 4 | 6.3 |  | ------ | 1.000* |
| 30-39 | 17 | 3 | 17.6 | 0.076ǂ | 79 | 8 | 10.1 | **0.036**ǂ | 1.90 (0.45-8.07) | 0.377 |
| 40-49 | 19 | 7 | 36.8 |  | 126 | 13 | 10.3 |  | 5.07 (1.69-15.1) | **0.002** |
| 50-59 | 44 | 8 | 18.2 |  | 136 | 22 | 16.2 |  | 1.15 (0.47-2.81) | 0.756 |
| 60-69 | 15 | 3 | 20.0 |  | 48 | 8 | 16.7 |  | 1.25 (0.29-5.47) | 0.767 |

**p* value was calculated from Fisher’s exact test

ǂ*p* value for trend was calculated from Chi-square test
